# Supplementary material for: Sex-Specific Association of the X Chromosome With Cognitive Change and Tau Pathology in Aging and Alzheimer Disease
Source: PubMed Central journal article supplement (PMC8383157; doi:10.1001/jamaneurol.2021.2806), 2021-08-23
Supplement: jamaneurol-e212806-s001.pdf [file jamaneurol-e212806-s001.pdf]

## Supplemental Online Content

Davis EJ, Solsberg CW, White CC, et al. Sex-specific association of the X chromosome with cognitive change and tau pathology in aging and Alzheimer disease. *JAMA Neurol*. Published online August 23, 2021. doi:10.1001/jamaneurol.2021.2806

### **eMethods.**

**eTable 1.** Clinical Diagnoses of Patients in ROSMAP cohort separated by sex

**eTable 2.** Association of X chromosome gene expression with cognition, adjusted for age, education, and AD pathology, in women

**eTable 3.** Association of X chromosome gene expression with cognition, adjusted for age, education, and AD pathology, in men

**eTable 4.** Global cognitive decline and NFT in men compared to women, adjusted by age and education

**eTable 5.** Association of X chromosome gene expression with neurofibrillary tangles in women, adjusted by age and education

**eTable 6.** Association of X chromosome gene expression with neurofibrillary tangles in men, adjusted by age and education

### **eReferences.**

This supplemental material has been provided by the authors to give readers additional information about their work.

## eMethods

**Participants.** Participants were without known dementia at enrollment, agreed to brain donation, signed a repository consent allowing their data to be repurposed, and were longitudinally followed until death. Individuals were mostly of a non-Hispanic White background (311 of 315 women with 2 Hispanic White and 2 non-Hispanic Black backgrounds; 188 of 193 men with 2 Hispanic White and 3 non-Hispanic Black backgrounds).

**RNA Sequencing.** RNA-seq was carried out with the Illumina HiSeq2000 with 101 bp paired end reads for a targeted coverage of 50M paired reads. RNA-seq data quantification, quality control, data normalization, and association analyses have been described in detail<sup>1</sup> and include batch correction and removal of the effects of major biological (including age at death and sex) and technical (RIN, number of ribosomal bases, number of aligned reads, study index, and postmortem interval) confounding factors. Genes with at least 4 reads detected in at least 100 individuals were analyzed. The current analysis of coding genes yielded 13,822 genes including 488 X chromosome genes. In association analyses reported, significance was established genome-wide at a false discovery rate (FDR) adjusted p-value of <0.05. We performed linear regressions of data derived from RNA-seq of DLPFC with longitudinal change in global cognition and with NFT burden in individuals from the ROS/MAP joint cohorts (Table 1; eTable 1) using R (version 3.5, lm function).

**Cognitive testing.** The ROS and MAP methods of assessing cognition have been summarized in previous publications<sup>1-4</sup>. Briefly, uniform and comprehensive cognitive assessments were administered annually to the ROS and MAP participants; annual follow-up was similar between women and men (cohort-at-large, sampled 2012-2016,  $p=0.22$  by chi-square). Scores from 17 cognitive performance tests common to both studies were used to obtain a summary measure for global cognition. Each test was converted to a z-score based on the mean and standard deviation of the scores from all participants at baseline. The z-scores were averaged. The mean global cognition is the mean of both cohorts together at baseline and each unit is roughly one standard deviation. To obtain a measurement of cognitive change, the annual global cognitive scores were modeled longitudinally with a mixed effects model, adjusting for age, sex and education, providing the rate of cognitive change for each person.

**Tau Burden.** Tau burden, via measurement of neurofibrillary tangle (NFT), for each individual was assessed across eight regions of the brain to create a single summary measure as previously described<sup>1</sup>. Using global tau burden is relevant to the DLPFC because global tau deposition causes dysfunction across multiple connected regions and networks. Since the DLPFC is a cognitive hub with inputs from multiple regions and networks, correlating global tau burden with RNA seq of this area facilitates an approach that assess both direct and indirect, proximal and distal, influences of tau pathology. Briefly, to quantify an estimate of the burden of abnormally phosphorylated tau-positive NFT (PHFtau) levels present in the cortex at death, tissue was dissected from eight regions of the brain: the hippocampus, entorhinal cortex, anterior cingulate cortex, midfrontal cortex, superior frontal cortex, inferior temporal cortex, angular gyrus and calcarine cortex. Sections 20  $\mu\text{m}$  thick from each region were stained with antibodies to the tau protein and quantified with image analysis and stereology as previously described<sup>5,6</sup>. Briefly, PHFtau was labeled with the AT8 antibody. Using stereological mapping, the average density (per  $\text{mm}^2$ ) of PHFtau tangles was determined and scores across the eight regions were averaged to create a single summary measure.

**Clinical Diagnosis of AD at the time of death.** The clinical diagnosis of AD dementia follows the recommendation of the joint working group of the National Institute of Neurological and Communicative Disorders and Stroke and the AD and Related Disorders Association<sup>7</sup> and was previously described<sup>1</sup>. Briefly, the diagnosis required a history of cognitive decline along with impairment in memory and at least one other cognitive domain. After a participant died, a neurologist specializing in dementia reviewed clinical information and provided a summary

opinion of the most likely clinical diagnosis at the time of death. This summary diagnosis was blinded to all neuropathologic data; case conferences were held for consensus as necessary. AD dementia includes persons with probable or possible AD dementia.

Sex differences in global cognitive change and NFT burden. Sex differences in each of these measures was measured by linear regression, adjusted by age at death and education.

## eReferences

1. Mostafavi S, Gaiteri C, Sullivan SE, et al. A molecular network of the aging human brain provides insights into the pathology and cognitive decline of Alzheimer's disease. *Nat Neurosci*. 2018;21(6):811-819.
2. Bennett DA, Schneider JA, Arvanitakis Z, et al. Neuropathology of older persons without cognitive impairment from two community-based studies. *Neurology*. 2006;66(12):1837-1844.
3. Wilson RS, Beckett LA, Barnes LL, et al. Individual differences in rates of change in cognitive abilities of older persons. *Psychol Aging*. 2002;17(2):179-193.
4. Wilson RS, Boyle PA, Yu L, Segawa E, Sytsma J, Bennett DA. Conscientiousness, dementia related pathology, and trajectories of cognitive aging. *Psychol Aging*. 2015;30(1):74-82.
5. Bennett DA, Wilson RS, Boyle PA, Buchman AS, Schneider JA. Relation of neuropathology to cognition in persons without cognitive impairment. *Ann Neurol*. 2012;72(4):599-609.
6. Boyle PA, Wilson RS, Yu L, et al. Much of late life cognitive decline is not due to common neurodegenerative pathologies. *Ann Neurol*. 2013;74(3):478-489.
7. McKhann G, Drachman D, Folstein M, Katzman R, Price D, Stadlan EM. Clinical diagnosis of Alzheimer's disease: report of the NINCDS-ADRDA Work Group under the auspices of Department of Health and Human Services Task Force on Alzheimer's Disease. *Neurology*. 1984;34(7):939-944.

| <b>eTable 1. Clinical Diagnoses of Patients in ROSMAP cohort separated by sex</b> |                       |                     |                      |
|-----------------------------------------------------------------------------------|-----------------------|---------------------|----------------------|
|                                                                                   | <b>Women (n=315)†</b> | <b>Men (n=193)†</b> | <b>Total (n=508)</b> |
| NCI                                                                               | 98 (31.1%)            | 68 (35.2%)          | 166 (32.7%)          |
| MCI no other cause                                                                | 79 (25.1%)            | 45 (23.3%)          | 124 (24.4%)          |
| MCI plus other cause                                                              | 3 (1.0%)              | 6 (3.1%)            | 9 (1.8%)             |
| AD and no other cause                                                             | 118 (37.5%)           | 55 (28.5%)          | 173 (34.1%)          |
| AD plus other cause                                                               | 11 (3.5%)             | 13 (6.7%)           | 24 (4.7%)            |
| Other dementia                                                                    | 6 (1.9%)              | 6 (3.1%)            | 12 (2.4%)            |

Data shown as count (percent of column total).

NCI=no cognitive impairment; MCI=mild cognitive impairment; AD=Alzheimer's disease

† women and men diagnostic distributions do not differ significantly (chi-square test p-value=0.24)

**eTable 2. Association of X chromosome gene expression with cognition, adjusted for age, education, and AD pathology, in women. FDR-adjusted p-values for genome-wide correction shown.**

| <b>Gene</b>     | <b>Beta</b> | <b>Pvalue</b> | <b>Pvalue Adjusted</b> |
|-----------------|-------------|---------------|------------------------|
| <i>APLN</i>     | -0.0257     | 0.0000        | <b>0.0006</b>          |
| <i>FOXO4</i>    | -0.0253     | 0.0000        | <b>0.0020</b>          |
| <i>WWC3</i>     | -0.0259     | 0.0000        | <b>0.0022</b>          |
| <i>MID1IP1</i>  | -0.0247     | 0.0000        | <b>0.0022</b>          |
| <i>MED12</i>    | -0.0242     | 0.0000        | <b>0.0032</b>          |
| <i>PPEF1</i>    | 0.0230      | 0.0000        | <b>0.0041</b>          |
| <i>EIF1AX</i>   | 0.0221      | 0.0000        | <b>0.0060</b>          |
| <i>GPRASP1</i>  | 0.0214      | 0.0000        | <b>0.0082</b>          |
| <i>GPRASP2</i>  | 0.0221      | 0.0000        | <b>0.0084</b>          |
| <i>NGFRAP1</i>  | 0.0203      | 0.0001        | <b>0.0121</b>          |
| <i>ZCCHC12</i>  | 0.0205      | 0.0001        | <b>0.0127</b>          |
| <i>FAM156B</i>  | 0.0191      | 0.0002        | <b>0.0191</b>          |
| <i>XK</i>       | 0.0194      | 0.0002        | <b>0.0204</b>          |
| <i>ACSL4</i>    | 0.0194      | 0.0002        | <b>0.0224</b>          |
| <i>VMA21</i>    | 0.0187      | 0.0002        | <b>0.0228</b>          |
| <i>RLIM</i>     | 0.0190      | 0.0003        | <b>0.0235</b>          |
| <i>PHF16</i>    | -0.0187     | 0.0003        | <b>0.0250</b>          |
| <i>IRAK1</i>    | -0.0181     | 0.0004        | <b>0.0274</b>          |
| <i>GRIPAP1</i>  | 0.0189      | 0.0005        | <b>0.0285</b>          |
| <i>BEX2</i>     | 0.0180      | 0.0005        | <b>0.0290</b>          |
| <i>IL2RG</i>    | -0.0168     | 0.0005        | <b>0.0301</b>          |
| <i>ASMTL</i>    | 0.0177      | 0.0005        | <b>0.0303</b>          |
| <i>NAP1L2</i>   | 0.0175      | 0.0006        | <b>0.0312</b>          |
| <i>OTUD5</i>    | 0.0181      | 0.0006        | <b>0.0326</b>          |
| <i>RAB9A</i>    | -0.0175     | 0.0006        | <b>0.0333</b>          |
| <i>DYNLT3</i>   | 0.0174      | 0.0007        | <b>0.0347</b>          |
| <i>PNCK</i>     | 0.0166      | 0.0011        | <b>0.0453</b>          |
| <i>GRIA3</i>    | 0.0173      | 0.0012        | <b>0.0468</b>          |
| <i>POLA1</i>    | -0.0157     | 0.0013        | <b>0.0487</b>          |
| <i>PRKX</i>     | -0.0170     | 0.0015        | 0.0518                 |
| <i>BRCC3</i>    | 0.0166      | 0.0015        | 0.0522                 |
| <i>HMGN5</i>    | -0.0161     | 0.0016        | 0.0524                 |
| <i>ENOX2</i>    | -0.0164     | 0.0016        | 0.0535                 |
| <i>HS6ST2</i>   | 0.0169      | 0.0017        | 0.0537                 |
| <i>KCND1</i>    | 0.0167      | 0.0017        | 0.0543                 |
| <i>STS</i>      | 0.0166      | 0.0019        | 0.0572                 |
| <i>DLG3</i>     | 0.0160      | 0.0020        | 0.0596                 |
| <i>ATP2B3</i>   | 0.0161      | 0.0022        | 0.0621                 |
| <i>CCDC160</i>  | -0.0153     | 0.0022        | 0.0624                 |
| <i>FAM127A</i>  | 0.0161      | 0.0023        | 0.0629                 |
| <i>FRMPD4</i>   | 0.0160      | 0.0025        | 0.0654                 |
| <i>PIM2</i>     | 0.0156      | 0.0027        | 0.0685                 |
| <i>RRAGB</i>    | 0.0155      | 0.0027        | 0.0686                 |
| <i>CXorf40A</i> | 0.0158      | 0.0029        | 0.0717                 |
| <i>ARHGEF9</i>  | 0.0157      | 0.0030        | 0.0720                 |
| <i>PRPS2</i>    | 0.0153      | 0.0030        | 0.0724                 |

|                  |         |        |        |
|------------------|---------|--------|--------|
| <i>SLC25A14</i>  | 0.0152  | 0.0031 | 0.0734 |
| <i>SYP</i>       | 0.0150  | 0.0033 | 0.0752 |
| <i>ABCD1</i>     | -0.0157 | 0.0035 | 0.0759 |
| <i>ARHGEF6</i>   | -0.0143 | 0.0035 | 0.0764 |
| <i>PJA1</i>      | 0.0147  | 0.0036 | 0.0770 |
| <i>HPRT1</i>     | 0.0148  | 0.0037 | 0.0785 |
| <i>NKRF</i>      | 0.0149  | 0.0038 | 0.0795 |
| <i>UTP14A</i>    | 0.0153  | 0.0039 | 0.0804 |
| <i>REPS2</i>     | 0.0150  | 0.0043 | 0.0845 |
| <i>ZFX</i>       | -0.0147 | 0.0043 | 0.0853 |
| <i>RNF128</i>    | 0.0145  | 0.0045 | 0.0872 |
| <i>RENBP</i>     | -0.0148 | 0.0045 | 0.0875 |
| <i>PRICKLE3</i>  | -0.0142 | 0.0047 | 0.0892 |
| <i>TCEAL6</i>    | 0.0144  | 0.0048 | 0.0903 |
| <i>DACH2</i>     | 0.0140  | 0.0057 | 0.0980 |
| <i>ATP6AP2</i>   | 0.0142  | 0.0061 | 0.1020 |
| <i>ATP6AP1</i>   | 0.0145  | 0.0063 | 0.1034 |
| <i>CETN2</i>     | 0.0139  | 0.0071 | 0.1084 |
| <i>SMC1A</i>     | -0.0129 | 0.0075 | 0.1117 |
| <i>CXorf40B</i>  | 0.0139  | 0.0076 | 0.1123 |
| <i>MCTS1</i>     | 0.0135  | 0.0078 | 0.1133 |
| <i>MAGED1</i>    | 0.0135  | 0.0079 | 0.1138 |
| <i>ARMCX3</i>    | 0.0139  | 0.0080 | 0.1145 |
| <i>TIMM8A</i>    | 0.0147  | 0.0082 | 0.1165 |
| <i>SLITRK4</i>   | 0.0139  | 0.0086 | 0.1186 |
| <i>TAF9B</i>     | 0.0133  | 0.0086 | 0.1188 |
| <i>GDI1</i>      | 0.0130  | 0.0087 | 0.1196 |
| <i>CD99L2</i>    | 0.0139  | 0.0088 | 0.1203 |
| <i>DDX26B</i>    | 0.0133  | 0.0094 | 0.1247 |
| <i>MAGEH1</i>    | 0.0136  | 0.0096 | 0.1255 |
| <i>TSPAN6</i>    | -0.0135 | 0.0096 | 0.1256 |
| <i>ZRSR2</i>     | -0.0134 | 0.0100 | 0.1288 |
| <i>MED14</i>     | 0.0134  | 0.0105 | 0.1313 |
| <i>TXLNG</i>     | 0.0138  | 0.0108 | 0.1324 |
| <i>ELK1</i>      | -0.0132 | 0.0111 | 0.1344 |
| <i>NXT2</i>      | -0.0131 | 0.0113 | 0.1354 |
| <i>STAG2</i>     | -0.0135 | 0.0116 | 0.1368 |
| <i>GPM6B</i>     | -0.0129 | 0.0116 | 0.1372 |
| <i>PABPC1L2A</i> | 0.0130  | 0.0120 | 0.1388 |
| <i>UBA1</i>      | -0.0127 | 0.0121 | 0.1393 |
| <i>ARMCX5</i>    | 0.0131  | 0.0127 | 0.1424 |
| <i>PHF8</i>      | -0.0127 | 0.0130 | 0.1441 |
| <i>UXT</i>       | -0.0131 | 0.0133 | 0.1458 |
| <i>PSMD10</i>    | 0.0121  | 0.0141 | 0.1505 |
| <i>ARMCX2</i>    | 0.0126  | 0.0141 | 0.1505 |
| <i>PNMA5</i>     | 0.0125  | 0.0142 | 0.1507 |
| <i>PQBPI</i>     | -0.0131 | 0.0147 | 0.1526 |
| <i>UPRT</i>      | 0.0126  | 0.0147 | 0.1527 |
| <i>PNMA3</i>     | 0.0125  | 0.0148 | 0.1531 |

|                  |         |        |        |
|------------------|---------|--------|--------|
| <i>MBTPS2</i>    | 0.0130  | 0.0156 | 0.1559 |
| <i>RAB9B</i>     | 0.0128  | 0.0156 | 0.1560 |
| <i>CDKL5</i>     | 0.0127  | 0.0161 | 0.1581 |
| <i>ZBED1</i>     | -0.0122 | 0.0164 | 0.1596 |
| <i>ATP11C</i>    | -0.0119 | 0.0165 | 0.1601 |
| <i>PRRG3</i>     | 0.0128  | 0.0170 | 0.1616 |
| <i>HCFC1</i>     | -0.0120 | 0.0177 | 0.1651 |
| <i>PGRMC1</i>    | 0.0126  | 0.0185 | 0.1678 |
| <i>LAMP2</i>     | -0.0120 | 0.0186 | 0.1680 |
| <i>TCEAL7</i>    | 0.0125  | 0.0189 | 0.1693 |
| <i>TMEM35</i>    | 0.0119  | 0.0190 | 0.1700 |
| <i>RBM10</i>     | 0.0122  | 0.0195 | 0.1724 |
| <i>DRP2</i>      | 0.0122  | 0.0197 | 0.1734 |
| <i>MUM1L1</i>    | 0.0121  | 0.0199 | 0.1740 |
| <i>ERAS</i>      | 0.0118  | 0.0203 | 0.1753 |
| <i>TMSB4X</i>    | 0.0115  | 0.0204 | 0.1759 |
| <i>ZC4H2</i>     | 0.0126  | 0.0209 | 0.1781 |
| <i>SLC25A53</i>  | -0.0119 | 0.0214 | 0.1801 |
| <i>BEX5</i>      | 0.0115  | 0.0217 | 0.1813 |
| <i>BCAP31</i>    | 0.0118  | 0.0220 | 0.1827 |
| <i>AMOT</i>      | -0.0116 | 0.0224 | 0.1847 |
| <i>SYTL4</i>     | -0.0115 | 0.0238 | 0.1902 |
| <i>EIF2S3</i>    | 0.0119  | 0.0240 | 0.1911 |
| <i>GABRA3</i>    | 0.0116  | 0.0243 | 0.1924 |
| <i>EMD</i>       | 0.0114  | 0.0247 | 0.1934 |
| <i>PRRG1</i>     | -0.0116 | 0.0262 | 0.1996 |
| <i>NLGN3</i>     | -0.0111 | 0.0263 | 0.2000 |
| <i>USP11</i>     | 0.0114  | 0.0264 | 0.2002 |
| <i>XIAP</i>      | 0.0113  | 0.0267 | 0.2016 |
| <i>AP1S2</i>     | 0.0113  | 0.0270 | 0.2024 |
| <i>SMS</i>       | 0.0115  | 0.0275 | 0.2042 |
| <i>MECP2</i>     | -0.0115 | 0.0278 | 0.2047 |
| <i>PORCN</i>     | 0.0115  | 0.0287 | 0.2078 |
| <i>MPP1</i>      | 0.0114  | 0.0290 | 0.2093 |
| <i>TCEAL5</i>    | 0.0109  | 0.0295 | 0.2109 |
| <i>MAGEE1</i>    | 0.0111  | 0.0300 | 0.2131 |
| <i>THOC2</i>     | -0.0109 | 0.0307 | 0.2156 |
| <i>PABPC1L2B</i> | 0.0112  | 0.0317 | 0.2178 |
| <i>ZNF275</i>    | -0.0109 | 0.0323 | 0.2199 |
| <i>NUDT11</i>    | 0.0108  | 0.0331 | 0.2229 |
| <i>MORF4L2</i>   | 0.0109  | 0.0340 | 0.2258 |
| <i>MTM1</i>      | -0.0103 | 0.0342 | 0.2264 |
| <i>FGF13</i>     | 0.0109  | 0.0354 | 0.2300 |
| <i>LONRF3</i>    | -0.0110 | 0.0356 | 0.2306 |
| <i>BEX1</i>      | 0.0108  | 0.0358 | 0.2311 |
| <i>PDK3</i>      | 0.0109  | 0.0377 | 0.2367 |
| <i>TBLIX</i>     | -0.0104 | 0.0378 | 0.2372 |
| <i>BEX4</i>      | 0.0107  | 0.0382 | 0.2388 |
| <i>PRPS1</i>     | 0.0107  | 0.0396 | 0.2437 |

|                 |         |        |        |
|-----------------|---------|--------|--------|
| <i>HNRNPH2</i>  | 0.0107  | 0.0398 | 0.2441 |
| <i>AKAP17A</i>  | -0.0108 | 0.0399 | 0.2444 |
| <i>WBP5</i>     | -0.0107 | 0.0401 | 0.2453 |
| <i>MCF2</i>     | 0.0105  | 0.0410 | 0.2480 |
| <i>CXorf24</i>  | -0.0111 | 0.0411 | 0.2483 |
| <i>F8</i>       | 0.0106  | 0.0427 | 0.2535 |
| <i>TAB3</i>     | 0.0109  | 0.0430 | 0.2543 |
| <i>GPR34</i>    | -0.0100 | 0.0466 | 0.2642 |
| <i>FAAH2</i>    | 0.0100  | 0.0473 | 0.2663 |
| <i>KLF8</i>     | 0.0098  | 0.0485 | 0.2696 |
| <i>SHROOM2</i>  | 0.0105  | 0.0487 | 0.2701 |
| <i>NAPIL3</i>   | 0.0100  | 0.0523 | 0.2798 |
| <i>RAB39B</i>   | 0.0101  | 0.0526 | 0.2805 |
| <i>STARD8</i>   | -0.0099 | 0.0526 | 0.2806 |
| <i>GPC4</i>     | -0.0095 | 0.0546 | 0.2862 |
| <i>ZNF75D</i>   | 0.0101  | 0.0552 | 0.2884 |
| <i>PPP1R3F</i>  | 0.0096  | 0.0553 | 0.2885 |
| <i>HSD17B10</i> | -0.0098 | 0.0557 | 0.2886 |
| <i>GLA</i>      | 0.0098  | 0.0559 | 0.2891 |
| <i>ZMAT1</i>    | 0.0098  | 0.0561 | 0.2896 |
| <i>HMGB3</i>    | 0.0100  | 0.0564 | 0.2905 |
| <i>TSR2</i>     | 0.0098  | 0.0580 | 0.2949 |
| <i>WDR13</i>    | -0.0093 | 0.0597 | 0.2992 |
| <i>IDS</i>      | 0.0099  | 0.0598 | 0.2994 |
| <i>SLC9A6</i>   | 0.0100  | 0.0599 | 0.2997 |
| <i>SPIN2B</i>   | 0.0096  | 0.0605 | 0.3013 |
| <i>PTCHD1</i>   | -0.0097 | 0.0635 | 0.3077 |
| <i>ARAF</i>     | -0.0093 | 0.0678 | 0.3169 |
| <i>MAGED4B</i>  | -0.0096 | 0.0679 | 0.3171 |
| <i>PLP1</i>     | -0.0095 | 0.0682 | 0.3178 |
| <i>BHLHB9</i>   | 0.0094  | 0.0696 | 0.3210 |
| <i>CXorf36</i>  | -0.0093 | 0.0711 | 0.3243 |
| <i>PIGA</i>     | -0.0093 | 0.0719 | 0.3263 |
| <i>AMMECR1</i>  | 0.0092  | 0.0732 | 0.3293 |
| <i>UBQLN2</i>   | 0.0095  | 0.0748 | 0.3321 |
| <i>OCRL</i>     | 0.0093  | 0.0768 | 0.3361 |
| <i>KIAA2022</i> | 0.0091  | 0.0784 | 0.3406 |
| <i>PLXNB3</i>   | -0.0091 | 0.0794 | 0.3422 |
| <i>IL3RA</i>    | -0.0090 | 0.0802 | 0.3440 |
| <i>TSPAN7</i>   | 0.0093  | 0.0804 | 0.3444 |
| <i>TMEM47</i>   | -0.0089 | 0.0828 | 0.3482 |
| <i>DCX</i>      | 0.0086  | 0.0873 | 0.3589 |
| <i>NLGN4X</i>   | 0.0091  | 0.0875 | 0.3593 |
| <i>NUDT10</i>   | 0.0088  | 0.0876 | 0.3595 |
| <i>SASH3</i>    | -0.0084 | 0.0881 | 0.3604 |
| <i>PPP2R3B</i>  | -0.0087 | 0.0884 | 0.3610 |
| <i>GSPT2</i>    | 0.0090  | 0.0929 | 0.3700 |
| <i>PGK1</i>     | 0.0085  | 0.0936 | 0.3712 |
| <i>FAM199X</i>  | 0.0088  | 0.0947 | 0.3728 |

|                      |         |        |        |
|----------------------|---------|--------|--------|
| <i>DHRX</i>          | -0.0085 | 0.0949 | 0.3729 |
| <i>SHROOM4</i>       | -0.0087 | 0.0970 | 0.3767 |
| <i>ZXDB</i>          | 0.0086  | 0.0972 | 0.3771 |
| <i>TBC1D8B</i>       | -0.0088 | 0.0974 | 0.3776 |
| <i>ALG13</i>         | 0.0085  | 0.0989 | 0.3798 |
| <i>FAM123B</i>       | 0.0082  | 0.1058 | 0.3932 |
| <i>SLC9A7</i>        | 0.0087  | 0.1080 | 0.3972 |
| <i>APOO</i>          | -0.0080 | 0.1098 | 0.4007 |
| <i>TIMM17B</i>       | 0.0079  | 0.1119 | 0.4042 |
| <i>HUWE1</i>         | -0.0080 | 0.1121 | 0.4047 |
| <i>SLC35A2</i>       | 0.0082  | 0.1141 | 0.4078 |
| <i>MAP7D2</i>        | 0.0081  | 0.1142 | 0.4080 |
| <i>HEPH</i>          | -0.0080 | 0.1152 | 0.4099 |
| <i>DMRTC1B</i>       | 0.0080  | 0.1156 | 0.4107 |
| <i>TCEAL2</i>        | 0.0080  | 0.1171 | 0.4122 |
| <i>WAS</i>           | -0.0082 | 0.1168 | 0.4122 |
| <i>F8A2</i>          | -0.0084 | 0.1175 | 0.4128 |
| <i>RP11-274K13.2</i> | -0.0082 | 0.1189 | 0.4159 |
| <i>CCDC120</i>       | -0.0079 | 0.1193 | 0.4163 |
| <i>F8A3</i>          | -0.0083 | 0.1200 | 0.4173 |
| <i>FAM70A</i>        | -0.0080 | 0.1226 | 0.4214 |
| <i>TRO</i>           | 0.0079  | 0.1231 | 0.4224 |
| <i>CITED1</i>        | 0.0077  | 0.1236 | 0.4230 |
| <i>RNF113A</i>       | -0.0082 | 0.1247 | 0.4250 |
| <i>ZNF711</i>        | 0.0081  | 0.1253 | 0.4256 |
| <i>CUL4B</i>         | 0.0078  | 0.1258 | 0.4262 |
| <i>SEPT</i>          | 0.0080  | 0.1269 | 0.4278 |
| <i>GJB1</i>          | -0.0081 | 0.1275 | 0.4288 |
| <i>USP51</i>         | 0.0075  | 0.1275 | 0.4288 |
| <i>GTPBP6</i>        | -0.0078 | 0.1279 | 0.4294 |
| <i>EBP</i>           | 0.0077  | 0.1286 | 0.4304 |
| <i>FMR1</i>          | 0.0078  | 0.1289 | 0.4310 |
| <i>TAZ</i>           | -0.0079 | 0.1312 | 0.4343 |
| <i>PIR</i>           | 0.0082  | 0.1321 | 0.4358 |
| <i>SLITRK2</i>       | -0.0076 | 0.1332 | 0.4370 |
| <i>RGAG4</i>         | 0.0077  | 0.1348 | 0.4399 |
| <i>MTCP1NB</i>       | -0.0075 | 0.1417 | 0.4514 |
| <i>RAB33A</i>        | -0.0078 | 0.1437 | 0.4539 |
| <i>RPL36A</i>        | -0.0076 | 0.1461 | 0.4573 |
| <i>ZNF673</i>        | 0.0077  | 0.1477 | 0.4593 |
| <i>CNKSR2</i>        | 0.0076  | 0.1483 | 0.4599 |
| <i>FAM120C</i>       | -0.0071 | 0.1521 | 0.4646 |
| <i>FAM127C</i>       | -0.0077 | 0.1524 | 0.4649 |
| <i>HAUS7</i>         | 0.0072  | 0.1535 | 0.4661 |
| <i>YIPF6</i>         | -0.0072 | 0.1544 | 0.4677 |
| <i>RP1-177G6.2</i>   | -0.0073 | 0.1552 | 0.4686 |
| <i>EFHC2</i>         | -0.0071 | 0.1600 | 0.4753 |
| <i>SLC25A43</i>      | -0.0075 | 0.1623 | 0.4780 |
| <i>CXorf38</i>       | -0.0069 | 0.1637 | 0.4799 |

|                   |         |        |        |
|-------------------|---------|--------|--------|
| <i>ZC3H12B</i>    | 0.0072  | 0.1639 | 0.4803 |
| <i>KDM6A</i>      | -0.0068 | 0.1653 | 0.4821 |
| <i>WASH6P</i>     | -0.0073 | 0.1659 | 0.4826 |
| <i>KLHL15</i>     | 0.0071  | 0.1708 | 0.4896 |
| <i>RBM41</i>      | -0.0070 | 0.1712 | 0.4904 |
| <i>RBM3</i>       | 0.0070  | 0.1729 | 0.4930 |
| <i>TCEAL1</i>     | -0.0072 | 0.1729 | 0.4930 |
| <i>CXorf26</i>    | 0.0070  | 0.1808 | 0.5034 |
| <i>BRWD3</i>      | -0.0069 | 0.1842 | 0.5082 |
| <i>AL158821.1</i> | -0.0070 | 0.1846 | 0.5087 |
| <i>PLS3</i>       | 0.0068  | 0.1855 | 0.5099 |
| <i>SSR4</i>       | 0.0072  | 0.1893 | 0.5144 |
| <i>RGN</i>        | -0.0068 | 0.1893 | 0.5145 |
| <i>DMD</i>        | -0.0068 | 0.1916 | 0.5166 |
| <i>DDX3X</i>      | -0.0064 | 0.1917 | 0.5168 |
| <i>NHS</i>        | -0.0067 | 0.1925 | 0.5179 |
| <i>RIBC1</i>      | 0.0067  | 0.1944 | 0.5199 |
| <i>CSAG1</i>      | -0.0068 | 0.1966 | 0.5228 |
| <i>IGBP1</i>      | 0.0068  | 0.1966 | 0.5228 |
| <i>TMSB15B</i>    | 0.0066  | 0.2060 | 0.5343 |
| <i>SPIN3</i>      | 0.0067  | 0.2067 | 0.5352 |
| <i>MSN</i>        | -0.0062 | 0.2083 | 0.5367 |
| <i>PNMA6C</i>     | 0.0072  | 0.2103 | 0.5395 |
| <i>FAM50A</i>     | -0.0065 | 0.2109 | 0.5403 |
| <i>IL1RAPL1</i>   | 0.0061  | 0.2139 | 0.5441 |
| <i>PNPLA4</i>     | 0.0063  | 0.2146 | 0.5452 |
| <i>VBPI</i>       | 0.0067  | 0.2159 | 0.5467 |
| <i>TCEAL8</i>     | 0.0064  | 0.2175 | 0.5487 |
| <i>DIAPH2</i>     | 0.0066  | 0.2206 | 0.5525 |
| <i>PRAF2</i>      | 0.0063  | 0.2208 | 0.5528 |
| <i>LICAM</i>      | 0.0062  | 0.2216 | 0.5536 |
| <i>TMEM164</i>    | -0.0062 | 0.2276 | 0.5606 |
| <i>CLIC2</i>      | -0.0060 | 0.2370 | 0.5702 |
| <i>ARMCX1</i>     | 0.0060  | 0.2372 | 0.5704 |
| <i>VSIG4</i>      | -0.0059 | 0.2381 | 0.5713 |
| <i>ZNF185</i>     | 0.0063  | 0.2390 | 0.5724 |
| <i>MORC4</i>      | -0.0059 | 0.2469 | 0.5808 |
| <i>PHKA1</i>      | -0.0060 | 0.2485 | 0.5825 |
| <i>ARMCX6</i>     | -0.0058 | 0.2538 | 0.5877 |
| <i>NAA10</i>      | 0.0059  | 0.2569 | 0.5909 |
| <i>FATE1</i>      | -0.0062 | 0.2572 | 0.5909 |
| <i>LDOC1</i>      | 0.0060  | 0.2572 | 0.5909 |
| <i>SAT1</i>       | -0.0059 | 0.2571 | 0.5909 |
| <i>MAGIX</i>      | 0.0057  | 0.2581 | 0.5918 |
| <i>WDR45</i>      | -0.0057 | 0.2614 | 0.5951 |
| <i>BTK</i>        | 0.0056  | 0.2622 | 0.5960 |
| <i>CCDC22</i>     | 0.0059  | 0.2646 | 0.5982 |
| <i>FTSJI</i>      | 0.0055  | 0.2659 | 0.5995 |
| <i>CHM</i>        | 0.0058  | 0.2668 | 0.6003 |

|                 |         |        |        |
|-----------------|---------|--------|--------|
| <i>CTPS2</i>    | 0.0054  | 0.2822 | 0.6154 |
| <i>GK</i>       | 0.0055  | 0.2846 | 0.6176 |
| <i>UBL4A</i>    | -0.0053 | 0.2859 | 0.6189 |
| <i>CHIC1</i>    | 0.0055  | 0.2865 | 0.6196 |
| <i>KDM5C</i>    | -0.0052 | 0.2880 | 0.6212 |
| <i>CD99</i>     | -0.0055 | 0.2886 | 0.6217 |
| <i>PDZD11</i>   | 0.0056  | 0.2888 | 0.6220 |
| <i>MMGT1</i>    | 0.0055  | 0.2894 | 0.6227 |
| <i>CXorf69</i>  | -0.0053 | 0.2904 | 0.6237 |
| <i>MID1</i>     | -0.0052 | 0.2918 | 0.6245 |
| <i>PAK3</i>     | 0.0052  | 0.2943 | 0.6263 |
| <i>ZMYM3</i>    | -0.0053 | 0.2968 | 0.6284 |
| <i>COX7B</i>    | 0.0056  | 0.3037 | 0.6335 |
| <i>BGN</i>      | -0.0054 | 0.3043 | 0.6342 |
| <i>NONO</i>     | -0.0050 | 0.3103 | 0.6399 |
| <i>TSC22D3</i>  | -0.0052 | 0.3150 | 0.6444 |
| <i>PDZD4</i>    | 0.0052  | 0.3182 | 0.6475 |
| <i>LAGE3</i>    | 0.0051  | 0.3193 | 0.6485 |
| <i>KCNE1L</i>   | -0.0057 | 0.3209 | 0.6500 |
| <i>CDK16</i>    | -0.0050 | 0.3217 | 0.6505 |
| <i>GPR143</i>   | 0.0051  | 0.3227 | 0.6516 |
| <i>IQSEC2</i>   | 0.0050  | 0.3240 | 0.6527 |
| <i>PLP2</i>     | -0.0051 | 0.3242 | 0.6529 |
| <i>BCOR</i>     | 0.0050  | 0.3253 | 0.6537 |
| <i>RAI2</i>     | -0.0050 | 0.3263 | 0.6541 |
| <i>COL4A5</i>   | -0.0050 | 0.3267 | 0.6543 |
| <i>PHF6</i>     | -0.0049 | 0.3292 | 0.6568 |
| <i>IL13RA1</i>  | -0.0050 | 0.3307 | 0.6580 |
| <i>TMEM185A</i> | 0.0050  | 0.3328 | 0.6599 |
| <i>F8A1</i>     | 0.0053  | 0.3415 | 0.6668 |
| <i>BCORL1</i>   | -0.0047 | 0.3478 | 0.6713 |
| <i>EFNB1</i>    | -0.0050 | 0.3484 | 0.6714 |
| <i>SH3BGRL</i>  | -0.0046 | 0.3499 | 0.6728 |
| <i>ODZ1</i>     | 0.0048  | 0.3509 | 0.6738 |
| <i>SPIN2A</i>   | 0.0048  | 0.3554 | 0.6773 |
| <i>NDP</i>      | -0.0046 | 0.3594 | 0.6803 |
| <i>SLC6A8</i>   | -0.0047 | 0.3595 | 0.6803 |
| <i>IDH3G</i>    | -0.0046 | 0.3678 | 0.6870 |
| <i>FAM122C</i>  | 0.0044  | 0.3691 | 0.6882 |
| <i>PDHA1</i>    | 0.0049  | 0.3751 | 0.6927 |
| <i>ZNF630</i>   | 0.0046  | 0.3766 | 0.6940 |
| <i>HCCS</i>     | 0.0045  | 0.3835 | 0.6995 |
| <i>ARSE</i>     | -0.0045 | 0.3847 | 0.7007 |
| <i>TRMT2B</i>   | -0.0047 | 0.3867 | 0.7017 |
| <i>GNL3L</i>    | -0.0045 | 0.3909 | 0.7054 |
| <i>PIN4</i>     | -0.0045 | 0.3931 | 0.7069 |
| <i>SMPX</i>     | 0.0044  | 0.3998 | 0.7120 |
| <i>CSF2RA</i>   | -0.0045 | 0.4003 | 0.7123 |
| <i>PLXNA3</i>   | 0.0046  | 0.4005 | 0.7123 |

|                |         |        |        |
|----------------|---------|--------|--------|
| <i>UPF3B</i>   | -0.0041 | 0.4091 | 0.7191 |
| <i>MSL3</i>    | 0.0042  | 0.4154 | 0.7243 |
| <i>GDPD2</i>   | 0.0041  | 0.4179 | 0.7256 |
| <i>MAMLD1</i>  | -0.0041 | 0.4194 | 0.7267 |
| <i>ACRC</i>    | -0.0040 | 0.4212 | 0.7277 |
| <i>MAOA</i>    | -0.0040 | 0.4316 | 0.7352 |
| <i>SCML1</i>   | -0.0041 | 0.4339 | 0.7369 |
| <i>MTCP1</i>   | 0.0039  | 0.4346 | 0.7372 |
| <i>KLHL4</i>   | -0.0041 | 0.4369 | 0.7386 |
| <i>TRAPPC2</i> | 0.0040  | 0.4375 | 0.7389 |
| <i>FGD1</i>    | -0.0040 | 0.4410 | 0.7413 |
| <i>SRPK3</i>   | -0.0040 | 0.4452 | 0.7447 |
| <i>TBC1D25</i> | 0.0040  | 0.4465 | 0.7458 |
| <i>DUSP9</i>   | -0.0038 | 0.4472 | 0.7460 |
| <i>SYAP1</i>   | 0.0039  | 0.4489 | 0.7471 |
| <i>ZNF41</i>   | -0.0040 | 0.4490 | 0.7472 |
| <i>TFE3</i>    | -0.0038 | 0.4495 | 0.7476 |
| <i>FAM122B</i> | 0.0041  | 0.4533 | 0.7505 |
| <i>PCDH11X</i> | 0.0040  | 0.4536 | 0.7505 |
| <i>CXorf1</i>  | 0.0039  | 0.4549 | 0.7516 |
| <i>HDAC6</i>   | -0.0038 | 0.4585 | 0.7544 |
| <i>G6PD</i>    | -0.0039 | 0.4593 | 0.7546 |
| <i>GEMIN8</i>  | 0.0037  | 0.4631 | 0.7567 |
| <i>CXorf56</i> | 0.0038  | 0.4646 | 0.7578 |
| <i>SYN1</i>    | 0.0038  | 0.4692 | 0.7605 |
| <i>ZNF449</i>  | 0.0039  | 0.4712 | 0.7623 |
| <i>PRDX4</i>   | 0.0036  | 0.4716 | 0.7627 |
| <i>ZBTB33</i>  | -0.0037 | 0.4781 | 0.7669 |
| <i>IKBKG</i>   | 0.0037  | 0.4795 | 0.7676 |
| <i>LASIL</i>   | 0.0035  | 0.4902 | 0.7727 |
| <i>FUNDC1</i>  | 0.0035  | 0.4916 | 0.7732 |
| <i>MAP7D3</i>  | -0.0036 | 0.4950 | 0.7758 |
| <i>FAM156A</i> | 0.0036  | 0.4951 | 0.7759 |
| <i>RPL10</i>   | 0.0034  | 0.5032 | 0.7804 |
| <i>HSFX1</i>   | -0.0033 | 0.5117 | 0.7860 |
| <i>TIMP1</i>   | 0.0033  | 0.5149 | 0.7879 |
| <i>GPKOW</i>   | 0.0031  | 0.5215 | 0.7916 |
| <i>DKC1</i>    | -0.0033 | 0.5225 | 0.7925 |
| <i>CHST7</i>   | -0.0033 | 0.5306 | 0.7968 |
| <i>FRMPD3</i>  | 0.0033  | 0.5304 | 0.7968 |
| <i>WDR44</i>   | 0.0032  | 0.5325 | 0.7978 |
| <i>OPHN1</i>   | -0.0032 | 0.5331 | 0.7984 |
| <i>CFP</i>     | 0.0032  | 0.5374 | 0.8012 |
| <i>SMARCA1</i> | -0.0031 | 0.5400 | 0.8027 |
| <i>SH3KBP1</i> | 0.0034  | 0.5422 | 0.8043 |
| <i>TSPYL2</i>  | 0.0032  | 0.5456 | 0.8064 |
| <i>INE1</i>    | -0.0030 | 0.5481 | 0.8081 |
| <i>SLC38A5</i> | -0.0029 | 0.5624 | 0.8154 |
| <i>GPR173</i>  | -0.0029 | 0.5626 | 0.8155 |

|                      |         |        |        |
|----------------------|---------|--------|--------|
| <i>SNX12</i>         | 0.0030  | 0.5677 | 0.8186 |
| <i>CASK</i>          | 0.0029  | 0.5796 | 0.8249 |
| <i>FAM127B</i>       | -0.0028 | 0.5934 | 0.8342 |
| <i>PCDH19</i>        | 0.0026  | 0.5935 | 0.8342 |
| <i>CA5B</i>          | -0.0028 | 0.5938 | 0.8343 |
| <i>MAGEE2</i>        | 0.0028  | 0.5954 | 0.8348 |
| <i>ZNF674</i>        | -0.0027 | 0.5999 | 0.8368 |
| <i>PLCXD1</i>        | -0.0026 | 0.6059 | 0.8401 |
| <i>FAM155B</i>       | -0.0027 | 0.6080 | 0.8401 |
| <i>IGSF1</i>         | 0.0027  | 0.6085 | 0.8401 |
| <i>UBE2A</i>         | 0.0026  | 0.6097 | 0.8401 |
| <i>RPL39</i>         | 0.0026  | 0.6135 | 0.8406 |
| <i>RPGR</i>          | -0.0026 | 0.6193 | 0.8428 |
| <i>CYSLTR1</i>       | -0.0025 | 0.6244 | 0.8456 |
| <i>FAM133A</i>       | 0.0023  | 0.6335 | 0.8501 |
| <i>ATRX</i>          | 0.0024  | 0.6391 | 0.8526 |
| <i>CSTF2</i>         | 0.0025  | 0.6393 | 0.8527 |
| <i>FAM58A</i>        | -0.0023 | 0.6458 | 0.8559 |
| <i>CHRDL1</i>        | -0.0023 | 0.6510 | 0.8583 |
| <i>RP11-706O15.1</i> | 0.0022  | 0.6510 | 0.8583 |
| <i>ABCB7</i>         | -0.0022 | 0.6556 | 0.8605 |
| <i>RBBP7</i>         | -0.0023 | 0.6631 | 0.8647 |
| <i>CLCN4</i>         | 0.0023  | 0.6644 | 0.8658 |
| <i>HTATSF1</i>       | -0.0022 | 0.6751 | 0.8707 |
| <i>RHOXF1</i>        | 0.0024  | 0.6795 | 0.8724 |
| <i>ACOT9</i>         | -0.0021 | 0.6821 | 0.8739 |
| <i>RBMX</i>          | 0.0022  | 0.6831 | 0.8744 |
| <i>CYBB</i>          | -0.0019 | 0.6937 | 0.8807 |
| <i>TCEAL3</i>        | -0.0020 | 0.6943 | 0.8810 |
| <i>MAOB</i>          | 0.0019  | 0.6953 | 0.8816 |
| <i>ZNF182</i>        | 0.0020  | 0.7026 | 0.8847 |
| <i>MID2</i>          | -0.0019 | 0.7033 | 0.8849 |
| <i>FAM3A</i>         | 0.0019  | 0.7101 | 0.8884 |
| <i>MAGT1</i>         | 0.0019  | 0.7130 | 0.8895 |
| <i>MOSPD1</i>        | -0.0019 | 0.7146 | 0.8900 |
| <i>FHL1</i>          | 0.0017  | 0.7241 | 0.8946 |
| <i>PCSK1N</i>        | 0.0017  | 0.7310 | 0.8981 |
| <i>ITM2A</i>         | 0.0017  | 0.7349 | 0.9003 |
| <i>MAGED2</i>        | -0.0017 | 0.7384 | 0.9016 |
| <i>ARX</i>           | -0.0017 | 0.7439 | 0.9041 |
| <i>ARSD</i>          | 0.0017  | 0.7447 | 0.9047 |
| <i>ZDHHC15</i>       | 0.0017  | 0.7467 | 0.9056 |
| <i>VAMP7</i>         | 0.0016  | 0.7518 | 0.9078 |
| <i>HDAC8</i>         | 0.0016  | 0.7541 | 0.9089 |
| <i>KLHL13</i>        | -0.0016 | 0.7543 | 0.9090 |
| <i>FIGF</i>          | 0.0016  | 0.7553 | 0.9094 |
| <i>CXorf57</i>       | 0.0015  | 0.7734 | 0.9171 |
| <i>MTMR1</i>         | 0.0014  | 0.7782 | 0.9192 |
| <i>LRCH2</i>         | 0.0015  | 0.7834 | 0.9215 |

|                  |         |        |        |
|------------------|---------|--------|--------|
| <i>AFF2</i>      | 0.0014  | 0.7900 | 0.9242 |
| <i>OGT</i>       | 0.0013  | 0.7981 | 0.9279 |
| <i>SLC25A5</i>   | -0.0013 | 0.7999 | 0.9292 |
| <i>DNASE1L1</i>  | -0.0014 | 0.8006 | 0.9295 |
| <i>TMLHE</i>     | 0.0012  | 0.8192 | 0.9364 |
| <i>NDUFB11</i>   | 0.0011  | 0.8270 | 0.9399 |
| <i>TCEANC</i>    | -0.0012 | 0.8296 | 0.9407 |
| <i>TMEM187</i>   | -0.0011 | 0.8314 | 0.9414 |
| <i>TCEAL4</i>    | 0.0011  | 0.8352 | 0.9426 |
| <i>ARSF</i>      | 0.0010  | 0.8389 | 0.9439 |
| <i>ATG4A</i>     | -0.0010 | 0.8431 | 0.9449 |
| <i>ARHGAP4</i>   | -0.0010 | 0.8446 | 0.9453 |
| <i>PNMA6A</i>    | 0.0010  | 0.8465 | 0.9460 |
| <i>FLNA</i>      | -0.0010 | 0.8539 | 0.9492 |
| <i>SRPX</i>      | -0.0010 | 0.8540 | 0.9492 |
| <i>FAM104B</i>   | 0.0009  | 0.8552 | 0.9498 |
| <i>MAGEC3</i>    | 0.0009  | 0.8664 | 0.9540 |
| <i>OFD1</i>      | -0.0009 | 0.8665 | 0.9540 |
| <i>NSDHL</i>     | 0.0008  | 0.8751 | 0.9569 |
| <i>CXorf23</i>   | -0.0008 | 0.8766 | 0.9574 |
| <i>APOOL</i>     | -0.0008 | 0.8781 | 0.9581 |
| <i>SLC16A2</i>   | -0.0007 | 0.8849 | 0.9604 |
| <i>APEX2</i>     | -0.0007 | 0.8952 | 0.9640 |
| <i>RBMX2</i>     | 0.0006  | 0.9062 | 0.9670 |
| <i>SLC25A6</i>   | 0.0006  | 0.9073 | 0.9672 |
| <i>ZDHHC9</i>    | -0.0006 | 0.9078 | 0.9675 |
| <i>NDUFA1</i>    | -0.0006 | 0.9081 | 0.9676 |
| <i>ARMCX4</i>    | -0.0006 | 0.9102 | 0.9684 |
| <i>HDHD1</i>     | -0.0006 | 0.9120 | 0.9695 |
| <i>RPS6KA3</i>   | -0.0005 | 0.9192 | 0.9724 |
| <i>ZNF81</i>     | -0.0005 | 0.9232 | 0.9741 |
| <i>NKAP</i>      | 0.0004  | 0.9395 | 0.9793 |
| <i>USP9X</i>     | 0.0004  | 0.9425 | 0.9804 |
| <i>GYG2</i>      | 0.0003  | 0.9451 | 0.9815 |
| <i>TAF1</i>      | -0.0003 | 0.9494 | 0.9829 |
| <i>MOSPD2</i>    | -0.0003 | 0.9531 | 0.9841 |
| <i>SLC10A3</i>   | -0.0003 | 0.9553 | 0.9848 |
| <i>RPS4X</i>     | 0.0003  | 0.9601 | 0.9861 |
| <i>CIGALT1C1</i> | 0.0002  | 0.9607 | 0.9864 |
| <i>FUNDC2</i>    | 0.0002  | 0.9632 | 0.9870 |
| <i>SCML2</i>     | 0.0002  | 0.9657 | 0.9879 |
| <i>KAL1</i>      | -0.0002 | 0.9681 | 0.9888 |
| <i>RAP2C</i>     | -0.0001 | 0.9798 | 0.9935 |
| <i>AIFM1</i>     | 0.0001  | 0.9808 | 0.9936 |
| <i>SUV39H1</i>   | 0.0001  | 0.9837 | 0.9949 |
| <i>PCYT1B</i>    | 0.0001  | 0.9850 | 0.9952 |
| <i>DMRTC1</i>    | 0.0001  | 0.9912 | 0.9974 |
| <i>PHKA2</i>     | 0.0001  | 0.9923 | 0.9979 |
| <i>MAGED4</i>    | 0.0000  | 0.9933 | 0.9981 |

|              |        |        |        |
|--------------|--------|--------|--------|
| <i>GABRE</i> | 0.0000 | 0.9939 | 0.9983 |
|--------------|--------|--------|--------|

**eTable 3. Association of X chromosome gene expression with cognition, adjusted for age, education, and AD pathology, in men.** FDR-adjusted p-values for genome-wide correction shown.

| <b>Gene</b>          | <b>Beta</b> | <b>Pvalue</b> | <b>Pvalue Adjusted</b> |
|----------------------|-------------|---------------|------------------------|
| <i>TAF9B</i>         | 0.0232      | 0.0013        | 0.1768                 |
| <i>PTCHD1</i>        | -0.0218     | 0.0014        | 0.1805                 |
| <i>FRMPD3</i>        | -0.0203     | 0.0027        | 0.2053                 |
| <i>VMA21</i>         | 0.0206      | 0.0035        | 0.2085                 |
| <i>CLIC2</i>         | -0.0206     | 0.0036        | 0.2085                 |
| <i>DNASE1L1</i>      | 0.0182      | 0.0040        | 0.2150                 |
| <i>WBP5</i>          | -0.0193     | 0.0047        | 0.2289                 |
| <i>WASH6P</i>        | -0.0188     | 0.0072        | 0.2565                 |
| <i>PRKX</i>          | -0.0174     | 0.0072        | 0.2565                 |
| <i>TAZ</i>           | -0.0172     | 0.0105        | 0.2788                 |
| <i>MECP2</i>         | -0.0167     | 0.0126        | 0.2922                 |
| <i>ELK1</i>          | -0.0173     | 0.0129        | 0.2951                 |
| <i>MAGED4B</i>       | -0.0171     | 0.0139        | 0.2998                 |
| <i>BRCC3</i>         | 0.0163      | 0.0142        | 0.3029                 |
| <i>FTSJ1</i>         | -0.0176     | 0.0148        | 0.3066                 |
| <i>TSC22D3</i>       | -0.0172     | 0.0152        | 0.3095                 |
| <i>PDZD11</i>        | 0.0165      | 0.0157        | 0.3121                 |
| <i>FOXO4</i>         | -0.0166     | 0.0162        | 0.3160                 |
| <i>HCFC1</i>         | -0.0170     | 0.0170        | 0.3205                 |
| <i>TSR2</i>          | 0.0161      | 0.0188        | 0.3282                 |
| <i>FAM127A</i>       | 0.0155      | 0.0196        | 0.3316                 |
| <i>DMD</i>           | 0.0153      | 0.0217        | 0.3401                 |
| <i>MORC4</i>         | -0.0155     | 0.0229        | 0.3456                 |
| <i>CSTF2</i>         | 0.0153      | 0.0240        | 0.3499                 |
| <i>PPEF1</i>         | 0.0157      | 0.0242        | 0.3513                 |
| <i>PRICKLE3</i>      | -0.0156     | 0.0249        | 0.3543                 |
| <i>ASMTL</i>         | 0.0157      | 0.0260        | 0.3589                 |
| <i>RP11-706O15.1</i> | 0.0161      | 0.0265        | 0.3599                 |
| <i>CXorf56</i>       | 0.0147      | 0.0272        | 0.3627                 |
| <i>HMGB3</i>         | 0.0151      | 0.0284        | 0.3678                 |
| <i>MID1IP1</i>       | -0.0144     | 0.0286        | 0.3688                 |
| <i>MED12</i>         | -0.0143     | 0.0293        | 0.3714                 |
| <i>PLS3</i>          | 0.0152      | 0.0294        | 0.3715                 |
| <i>PNMA5</i>         | 0.0157      | 0.0308        | 0.3768                 |
| <i>ITM2A</i>         | 0.0149      | 0.0352        | 0.3903                 |
| <i>GYG2</i>          | -0.0159     | 0.0360        | 0.3920                 |
| <i>MED14</i>         | 0.0137      | 0.0387        | 0.4019                 |
| <i>ARMCX5</i>        | 0.0137      | 0.0397        | 0.4054                 |
| <i>HSFX1</i>         | -0.0144     | 0.0400        | 0.4063                 |
| <i>RBM3</i>          | 0.0139      | 0.0422        | 0.4132                 |

|                    |         |        |        |
|--------------------|---------|--------|--------|
| <i>GPRASP2</i>     | 0.0131  | 0.0423 | 0.4132 |
| <i>RAB9A</i>       | -0.0141 | 0.0425 | 0.4141 |
| <i>HPRT1</i>       | 0.0144  | 0.0430 | 0.4157 |
| <i>SYAP1</i>       | 0.0134  | 0.0451 | 0.4197 |
| <i>SLC9A7</i>      | 0.0128  | 0.0462 | 0.4233 |
| <i>DDX26B</i>      | 0.0135  | 0.0466 | 0.4247 |
| <i>PHF8</i>        | -0.0136 | 0.0466 | 0.4247 |
| <i>PORCN</i>       | 0.0136  | 0.0473 | 0.4257 |
| <i>PDHA1</i>       | 0.0123  | 0.0478 | 0.4275 |
| <i>ARSD</i>        | 0.0138  | 0.0510 | 0.4359 |
| <i>TCEAL5</i>      | 0.0143  | 0.0512 | 0.4360 |
| <i>TAB3</i>        | 0.0127  | 0.0546 | 0.4423 |
| <i>RBMX</i>        | 0.0127  | 0.0555 | 0.4449 |
| <i>APLN</i>        | -0.0141 | 0.0575 | 0.4498 |
| <i>RPL10</i>       | 0.0133  | 0.0583 | 0.4520 |
| <i>TIMM8A</i>      | 0.0121  | 0.0594 | 0.4545 |
| <i>ZMYM3</i>       | -0.0136 | 0.0611 | 0.4579 |
| <i>TMEM187</i>     | -0.0132 | 0.0626 | 0.4612 |
| <i>PGRMC1</i>      | 0.0125  | 0.0635 | 0.4639 |
| <i>NDUFA1</i>      | 0.0128  | 0.0644 | 0.4646 |
| <i>COX7B</i>       | 0.0122  | 0.0660 | 0.4684 |
| <i>IL3RA</i>       | -0.0125 | 0.0662 | 0.4684 |
| <i>GPC4</i>        | -0.0136 | 0.0664 | 0.4687 |
| <i>POLA1</i>       | -0.0137 | 0.0668 | 0.4703 |
| <i>CDKL5</i>       | 0.0121  | 0.0673 | 0.4708 |
| <i>USP11</i>       | 0.0125  | 0.0696 | 0.4761 |
| <i>GPRASP1</i>     | 0.0124  | 0.0711 | 0.4795 |
| <i>RPI-177G6.2</i> | -0.0131 | 0.0723 | 0.4824 |
| <i>TMLHE</i>       | 0.0121  | 0.0738 | 0.4855 |
| <i>DYNLT3</i>      | 0.0126  | 0.0740 | 0.4855 |
| <i>PHKA2</i>       | -0.0117 | 0.0742 | 0.4858 |
| <i>BCOR</i>        | -0.0127 | 0.0746 | 0.4865 |
| <i>BEX1</i>        | 0.0125  | 0.0746 | 0.4865 |
| <i>MAP7D2</i>      | 0.0124  | 0.0766 | 0.4904 |
| <i>TMSB4X</i>      | 0.0131  | 0.0778 | 0.4922 |
| <i>STAG2</i>       | -0.0113 | 0.0795 | 0.4957 |
| <i>SPIN2B</i>      | 0.0128  | 0.0800 | 0.4963 |
| <i>BEX5</i>        | 0.0128  | 0.0809 | 0.4982 |
| <i>EMD</i>         | 0.0124  | 0.0828 | 0.5018 |
| <i>SMC1A</i>       | -0.0141 | 0.0827 | 0.5018 |
| <i>RNF128</i>      | 0.0122  | 0.0835 | 0.5030 |
| <i>BEX2</i>        | 0.0119  | 0.0839 | 0.5046 |

|                  |         |        |        |
|------------------|---------|--------|--------|
| <i>ACRC</i>      | -0.0126 | 0.0848 | 0.5057 |
| <i>RAP2C</i>     | 0.0111  | 0.0871 | 0.5099 |
| <i>SLC10A3</i>   | 0.0117  | 0.0911 | 0.5181 |
| <i>CXorf26</i>   | 0.0112  | 0.0914 | 0.5193 |
| <i>ABCB7</i>     | -0.0122 | 0.0926 | 0.5207 |
| <i>RRAGB</i>     | 0.0118  | 0.0948 | 0.5242 |
| <i>ZNF81</i>     | -0.0111 | 0.0966 | 0.5285 |
| <i>UPRT</i>      | 0.0111  | 0.0977 | 0.5306 |
| <i>ZNF711</i>    | 0.0113  | 0.0975 | 0.5306 |
| <i>SPIN2A</i>    | -0.0112 | 0.1002 | 0.5335 |
| <i>EIF1AX</i>    | 0.0112  | 0.1051 | 0.5406 |
| <i>KLF8</i>      | 0.0118  | 0.1055 | 0.5411 |
| <i>FAM199X</i>   | 0.0115  | 0.1095 | 0.5459 |
| <i>SLC38A5</i>   | 0.0119  | 0.1120 | 0.5495 |
| <i>CXorf24</i>   | -0.0099 | 0.1170 | 0.5582 |
| <i>RENBP</i>     | -0.0106 | 0.1190 | 0.5618 |
| <i>ZBTB33</i>    | -0.0108 | 0.1215 | 0.5663 |
| <i>MBTPS2</i>    | 0.0103  | 0.1230 | 0.5683 |
| <i>TCEANC</i>    | -0.0101 | 0.1237 | 0.5684 |
| <i>CIGALT1C1</i> | -0.0114 | 0.1235 | 0.5684 |
| <i>ZNF41</i>     | 0.0098  | 0.1294 | 0.5789 |
| <i>TFE3</i>      | -0.0110 | 0.1338 | 0.5850 |
| <i>CSAG1</i>     | -0.0100 | 0.1429 | 0.5955 |
| <i>GRIA3</i>     | 0.0098  | 0.1459 | 0.5985 |
| <i>F8</i>        | 0.0095  | 0.1475 | 0.6002 |
| <i>IRAK1</i>     | -0.0100 | 0.1477 | 0.6007 |
| <i>L1CAM</i>     | -0.0103 | 0.1480 | 0.6012 |
| <i>SCML2</i>     | -0.0106 | 0.1486 | 0.6018 |
| <i>PNMA3</i>     | 0.0100  | 0.1508 | 0.6047 |
| <i>UBE2A</i>     | 0.0099  | 0.1513 | 0.6051 |
| <i>USP9X</i>     | 0.0106  | 0.1534 | 0.6071 |
| <i>XK</i>        | 0.0096  | 0.1537 | 0.6073 |
| <i>PLXNB3</i>    | -0.0097 | 0.1541 | 0.6073 |
| <i>CD99L2</i>    | 0.0092  | 0.1544 | 0.6073 |
| <i>FAM156A</i>   | 0.0097  | 0.1557 | 0.6093 |
| <i>PNPLA4</i>    | 0.0103  | 0.1560 | 0.6099 |
| <i>TSPAN7</i>    | 0.0097  | 0.1575 | 0.6118 |
| <i>CXorf23</i>   | 0.0097  | 0.1579 | 0.6118 |
| <i>BEX4</i>      | 0.0099  | 0.1597 | 0.6141 |
| <i>RAB33A</i>    | -0.0091 | 0.1619 | 0.6155 |
| <i>GDI1</i>      | 0.0102  | 0.1648 | 0.6193 |
| <i>IL2RG</i>     | -0.0105 | 0.1657 | 0.6199 |

|                 |         |        |        |
|-----------------|---------|--------|--------|
| <i>ZBED1</i>    | -0.0098 | 0.1696 | 0.6228 |
| <i>VBPI</i>     | 0.0091  | 0.1702 | 0.6241 |
| <i>SYTL4</i>    | -0.0096 | 0.1719 | 0.6264 |
| <i>PHF16</i>    | -0.0096 | 0.1728 | 0.6273 |
| <i>FAM50A</i>   | -0.0096 | 0.1745 | 0.6296 |
| <i>SLC35A2</i>  | 0.0090  | 0.1764 | 0.6308 |
| <i>MAGED1</i>   | 0.0092  | 0.1813 | 0.6360 |
| <i>TRAPPC2</i>  | -0.0096 | 0.1817 | 0.6361 |
| <i>TCEAL6</i>   | 0.0091  | 0.1834 | 0.6380 |
| <i>TMEM185A</i> | -0.0090 | 0.1842 | 0.6382 |
| <i>CUL4B</i>    | 0.0095  | 0.1852 | 0.6389 |
| <i>STS</i>      | 0.0087  | 0.1892 | 0.6422 |
| <i>GNL3L</i>    | 0.0087  | 0.1921 | 0.6451 |
| <i>FAM155B</i>  | -0.0088 | 0.1934 | 0.6461 |
| <i>FUNDC1</i>   | 0.0093  | 0.1935 | 0.6463 |
| <i>FGF13</i>    | 0.0093  | 0.1970 | 0.6496 |
| <i>PLXNA3</i>   | -0.0084 | 0.1976 | 0.6503 |
| <i>VAMP7</i>    | 0.0095  | 0.1991 | 0.6519 |
| <i>OTUD5</i>    | 0.0083  | 0.1995 | 0.6520 |
| <i>TSPAN6</i>   | -0.0088 | 0.2024 | 0.6525 |
| <i>CCDC120</i>  | -0.0093 | 0.2037 | 0.6537 |
| <i>NAP1L2</i>   | 0.0088  | 0.2098 | 0.6604 |
| <i>TBLIX</i>    | -0.0090 | 0.2110 | 0.6618 |
| <i>ARMCX1</i>   | 0.0088  | 0.2110 | 0.6619 |
| <i>GSPT2</i>    | 0.0080  | 0.2119 | 0.6625 |
| <i>RGAG4</i>    | 0.0083  | 0.2129 | 0.6636 |
| <i>GPKOW</i>    | 0.0100  | 0.2134 | 0.6639 |
| <i>GDPD2</i>    | -0.0090 | 0.2135 | 0.6639 |
| <i>EFNB1</i>    | -0.0081 | 0.2150 | 0.6649 |
| <i>ARSE</i>     | -0.0085 | 0.2159 | 0.6661 |
| <i>SH3KBP1</i>  | 0.0076  | 0.2297 | 0.6782 |
| <i>GABRE</i>    | -0.0084 | 0.2301 | 0.6783 |
| <i>MID1</i>     | -0.0087 | 0.2326 | 0.6802 |
| <i>DLG3</i>     | 0.0079  | 0.2344 | 0.6815 |
| <i>SAT1</i>     | -0.0081 | 0.2352 | 0.6821 |
| <i>PCDH19</i>   | 0.0089  | 0.2367 | 0.6841 |
| <i>DUSP9</i>    | -0.0086 | 0.2398 | 0.6872 |
| <i>GK</i>       | 0.0086  | 0.2413 | 0.6890 |
| <i>VSIG4</i>    | -0.0087 | 0.2447 | 0.6919 |
| <i>NDP</i>      | -0.0082 | 0.2459 | 0.6928 |
| <i>G6PD</i>     | 0.0080  | 0.2483 | 0.6947 |
| <i>CHRDLI</i>   | 0.0082  | 0.2505 | 0.6960 |

|                   |         |        |        |
|-------------------|---------|--------|--------|
| <i>MAGIX</i>      | 0.0080  | 0.2518 | 0.6978 |
| <i>KDM6A</i>      | -0.0086 | 0.2559 | 0.7011 |
| <i>CCDC160</i>    | -0.0083 | 0.2573 | 0.7025 |
| <i>HEPH</i>       | -0.0079 | 0.2578 | 0.7029 |
| <i>AL158821.1</i> | -0.0075 | 0.2593 | 0.7037 |
| <i>LONRF3</i>     | -0.0076 | 0.2600 | 0.7043 |
| <i>SMS</i>        | 0.0080  | 0.2660 | 0.7108 |
| <i>ATRX</i>       | -0.0082 | 0.2709 | 0.7143 |
| <i>HNRNPH2</i>    | 0.0077  | 0.2709 | 0.7143 |
| <i>TCEAL7</i>     | 0.0074  | 0.2720 | 0.7155 |
| <i>PDZD4</i>      | -0.0076 | 0.2727 | 0.7163 |
| <i>EFHC2</i>      | -0.0078 | 0.2734 | 0.7164 |
| <i>TCEAL1</i>     | -0.0074 | 0.2740 | 0.7164 |
| <i>FAM127B</i>    | 0.0072  | 0.2748 | 0.7168 |
| <i>SH3BGRL</i>    | 0.0081  | 0.2748 | 0.7168 |
| <i>KDM5C</i>      | -0.0080 | 0.2775 | 0.7179 |
| <i>FIGF</i>       | -0.0072 | 0.2838 | 0.7231 |
| <i>SUV39H1</i>    | 0.0072  | 0.2857 | 0.7250 |
| <i>ARMCX3</i>     | 0.0073  | 0.2883 | 0.7268 |
| <i>CXorf38</i>    | 0.0077  | 0.2918 | 0.7285 |
| <i>PNMA6C</i>     | 0.0063  | 0.2961 | 0.7313 |
| <i>KCNE1L</i>     | -0.0064 | 0.2970 | 0.7319 |
| <i>HMG5</i>       | -0.0073 | 0.2978 | 0.7328 |
| <i>IDS</i>        | 0.0070  | 0.3001 | 0.7344 |
| <i>ZRSR2</i>      | -0.0071 | 0.3025 | 0.7364 |
| <i>AIFM1</i>      | 0.0071  | 0.3086 | 0.7386 |
| <i>GPR34</i>      | 0.0073  | 0.3078 | 0.7386 |
| <i>CHM</i>        | -0.0066 | 0.3091 | 0.7387 |
| <i>CETN2</i>      | 0.0073  | 0.3105 | 0.7399 |
| <i>PRAF2</i>      | 0.0072  | 0.3122 | 0.7414 |
| <i>ZCCHC12</i>    | 0.0070  | 0.3130 | 0.7422 |
| <i>ARHGEF6</i>    | -0.0074 | 0.3145 | 0.7427 |
| <i>BGN</i>        | -0.0068 | 0.3192 | 0.7465 |
| <i>SLC25A5</i>    | 0.0070  | 0.3204 | 0.7474 |
| <i>PHKA1</i>      | -0.0068 | 0.3223 | 0.7487 |
| <i>ZDHHC15</i>    | 0.0062  | 0.3232 | 0.7494 |
| <i>ARMCX2</i>     | 0.0067  | 0.3239 | 0.7498 |
| <i>WDR44</i>      | 0.0070  | 0.3243 | 0.7499 |
| <i>PABPC1L2A</i>  | -0.0066 | 0.3274 | 0.7522 |
| <i>SSR4</i>       | 0.0069  | 0.3284 | 0.7527 |
| <i>NGFRAP1</i>    | 0.0067  | 0.3299 | 0.7534 |
| <i>PRPS2</i>      | 0.0065  | 0.3305 | 0.7537 |

|                 |         |        |        |
|-----------------|---------|--------|--------|
| <i>PPP2R3B</i>  | -0.0068 | 0.3320 | 0.7552 |
| <i>IGSF1</i>    | -0.0065 | 0.3345 | 0.7569 |
| <i>UPF3B</i>    | -0.0072 | 0.3407 | 0.7604 |
| <i>TBC1D8B</i>  | -0.0063 | 0.3412 | 0.7608 |
| <i>DRP2</i>     | 0.0066  | 0.3433 | 0.7614 |
| <i>ARMCX4</i>   | 0.0064  | 0.3562 | 0.7693 |
| <i>UXT</i>      | -0.0062 | 0.3646 | 0.7751 |
| <i>ATP6AP2</i>  | 0.0063  | 0.3669 | 0.7761 |
| <i>CXorf40B</i> | 0.0062  | 0.3721 | 0.7780 |
| <i>SRPX</i>     | 0.0062  | 0.3699 | 0.7780 |
| <i>NONO</i>     | -0.0066 | 0.3746 | 0.7780 |
| <i>UTP14A</i>   | 0.0057  | 0.3727 | 0.7780 |
| <i>NAPIL3</i>   | 0.0061  | 0.3768 | 0.7789 |
| <i>DMRTC1B</i>  | -0.0061 | 0.3766 | 0.7789 |
| <i>RAI2</i>     | -0.0060 | 0.3789 | 0.7805 |
| <i>NUDT11</i>   | 0.0061  | 0.3843 | 0.7835 |
| <i>ARX</i>      | -0.0060 | 0.3849 | 0.7835 |
| <i>ZFX</i>      | -0.0061 | 0.3852 | 0.7838 |
| <i>MCTS1</i>    | 0.0061  | 0.3858 | 0.7844 |
| <i>ALG13</i>    | 0.0059  | 0.3892 | 0.7867 |
| <i>SMPX</i>     | 0.0060  | 0.3903 | 0.7871 |
| <i>HDHD1</i>    | 0.0055  | 0.3947 | 0.7892 |
| <i>ARHGEF9</i>  | 0.0057  | 0.3979 | 0.7909 |
| <i>TCEAL8</i>   | -0.0058 | 0.3993 | 0.7915 |
| <i>EBP</i>      | 0.0060  | 0.4001 | 0.7921 |
| <i>ZNF449</i>   | 0.0057  | 0.4007 | 0.7923 |
| <i>CCDC22</i>   | 0.0054  | 0.4009 | 0.7924 |
| <i>RBM10</i>    | -0.0054 | 0.4033 | 0.7939 |
| <i>ARHGAP4</i>  | 0.0057  | 0.4050 | 0.7946 |
| <i>PNCK</i>     | 0.0058  | 0.4086 | 0.7971 |
| <i>FHL1</i>     | 0.0061  | 0.4105 | 0.7983 |
| <i>LRCH2</i>    | -0.0055 | 0.4135 | 0.7995 |
| <i>MAP7D3</i>   | -0.0055 | 0.4140 | 0.7996 |
| <i>AFF2</i>     | -0.0053 | 0.4163 | 0.8008 |
| <i>OPHN1</i>    | -0.0059 | 0.4162 | 0.8008 |
| <i>SLC6A8</i>   | -0.0055 | 0.4177 | 0.8015 |
| <i>CXorf40A</i> | 0.0052  | 0.4190 | 0.8018 |
| <i>SNX12</i>    | 0.0055  | 0.4190 | 0.8018 |
| <i>MAGEH1</i>   | 0.0056  | 0.4195 | 0.8018 |
| <i>FMR1</i>     | 0.0057  | 0.4197 | 0.8018 |
| <i>FAM122B</i>  | 0.0054  | 0.4219 | 0.8032 |
| <i>HUWE1</i>    | -0.0056 | 0.4227 | 0.8038 |

|                |         |        |        |
|----------------|---------|--------|--------|
| <i>NHS</i>     | -0.0057 | 0.4229 | 0.8039 |
| <i>PCSK1N</i>  | 0.0061  | 0.4250 | 0.8051 |
| <i>ZNF275</i>  | 0.0056  | 0.4259 | 0.8056 |
| <i>MAGED2</i>  | 0.0056  | 0.4265 | 0.8058 |
| <i>FAM70A</i>  | -0.0054 | 0.4285 | 0.8064 |
| <i>SHROOM2</i> | 0.0050  | 0.4377 | 0.8121 |
| <i>TAF1</i>    | 0.0059  | 0.4410 | 0.8133 |
| <i>TMEM47</i>  | -0.0052 | 0.4416 | 0.8133 |
| <i>SPIN3</i>   | 0.0053  | 0.4422 | 0.8138 |
| <i>FAM3A</i>   | 0.0054  | 0.4426 | 0.8138 |
| <i>IL13RA1</i> | 0.0052  | 0.4526 | 0.8198 |
| <i>MAOA</i>    | 0.0053  | 0.4585 | 0.8224 |
| <i>APOO</i>    | 0.0053  | 0.4588 | 0.8226 |
| <i>TCEAL2</i>  | 0.0051  | 0.4599 | 0.8230 |
| <i>RBMX2</i>   | -0.0051 | 0.4615 | 0.8234 |
| <i>GPR143</i>  | 0.0052  | 0.4631 | 0.8240 |
| <i>MUM1L1</i>  | -0.0050 | 0.4629 | 0.8240 |
| <i>RPL39</i>   | -0.0051 | 0.4664 | 0.8258 |
| <i>IKBKG</i>   | 0.0050  | 0.4712 | 0.8278 |
| <i>FAM120C</i> | -0.0053 | 0.4720 | 0.8282 |
| <i>LASIL</i>   | 0.0050  | 0.4745 | 0.8289 |
| <i>CITED1</i>  | 0.0052  | 0.4745 | 0.8290 |
| <i>SMARCA1</i> | -0.0051 | 0.4760 | 0.8297 |
| <i>IDH3G</i>   | 0.0050  | 0.4790 | 0.8307 |
| <i>USP51</i>   | 0.0050  | 0.4852 | 0.8332 |
| <i>NLGN3</i>   | 0.0050  | 0.4873 | 0.8345 |
| <i>PRPS1</i>   | 0.0048  | 0.4911 | 0.8363 |
| <i>HDAC6</i>   | -0.0050 | 0.4927 | 0.8370 |
| <i>ATP2B3</i>  | 0.0045  | 0.5058 | 0.8443 |
| <i>APEX2</i>   | 0.0045  | 0.5068 | 0.8446 |
| <i>RIBC1</i>   | -0.0047 | 0.5072 | 0.8449 |
| <i>PJA1</i>    | 0.0046  | 0.5080 | 0.8453 |
| <i>PRRG1</i>   | -0.0045 | 0.5126 | 0.8474 |
| <i>TXLNG</i>   | 0.0042  | 0.5126 | 0.8474 |
| <i>MAGED4</i>  | -0.0043 | 0.5159 | 0.8494 |
| <i>SLC25A6</i> | 0.0043  | 0.5221 | 0.8524 |
| <i>CXorf57</i> | -0.0044 | 0.5271 | 0.8549 |
| <i>PIM2</i>    | 0.0043  | 0.5274 | 0.8551 |
| <i>PQBP1</i>   | 0.0042  | 0.5277 | 0.8552 |
| <i>PSMD10</i>  | 0.0048  | 0.5290 | 0.8560 |
| <i>ZNF185</i>  | 0.0043  | 0.5325 | 0.8579 |
| <i>WWC3</i>    | -0.0039 | 0.5346 | 0.8584 |

|                      |         |        |        |
|----------------------|---------|--------|--------|
| <i>CXorf36</i>       | -0.0043 | 0.5348 | 0.8585 |
| <i>RPS6KA3</i>       | -0.0041 | 0.5445 | 0.8641 |
| <i>TMEM164</i>       | -0.0042 | 0.5449 | 0.8644 |
| <i>RP11-274K13.2</i> | 0.0040  | 0.5499 | 0.8672 |
| <i>CA5B</i>          | 0.0041  | 0.5519 | 0.8684 |
| <i>GPM6B</i>         | -0.0041 | 0.5521 | 0.8685 |
| <i>HS6ST2</i>        | 0.0040  | 0.5542 | 0.8692 |
| <i>ZNF674</i>        | 0.0040  | 0.5560 | 0.8702 |
| <i>SLC25A53</i>      | 0.0040  | 0.5584 | 0.8713 |
| <i>PRDX4</i>         | -0.0044 | 0.5587 | 0.8714 |
| <i>GTPBP6</i>        | -0.0041 | 0.5593 | 0.8719 |
| <i>GJB1</i>          | 0.0038  | 0.5623 | 0.8733 |
| <i>LAMP2</i>         | -0.0039 | 0.5683 | 0.8760 |
| <i>CSF2RA</i>        | 0.0037  | 0.5698 | 0.8767 |
| <i>GRIPAP1</i>       | 0.0038  | 0.5718 | 0.8777 |
| <i>HSD17B10</i>      | 0.0040  | 0.5733 | 0.8784 |
| <i>PHF6</i>          | -0.0040 | 0.5741 | 0.8785 |
| <i>PNMA6A</i>        | -0.0039 | 0.5741 | 0.8785 |
| <i>ACOT9</i>         | 0.0039  | 0.5745 | 0.8785 |
| <i>WDR45</i>         | -0.0040 | 0.5750 | 0.8786 |
| <i>MMGT1</i>         | 0.0039  | 0.5810 | 0.8809 |
| <i>CXorf69</i>       | -0.0040 | 0.5831 | 0.8819 |
| <i>FAM123B</i>       | -0.0040 | 0.5835 | 0.8821 |
| <i>CTPS2</i>         | -0.0040 | 0.5853 | 0.8827 |
| <i>SCML1</i>         | 0.0036  | 0.5895 | 0.8844 |
| <i>DHRX</i>          | 0.0038  | 0.5931 | 0.8856 |
| <i>SYP</i>           | 0.0037  | 0.5951 | 0.8862 |
| <i>MCF2</i>          | -0.0037 | 0.5951 | 0.8862 |
| <i>TCEAL4</i>        | 0.0036  | 0.5954 | 0.8863 |
| <i>CFP</i>           | 0.0035  | 0.5966 | 0.8865 |
| <i>PRRG3</i>         | 0.0035  | 0.6019 | 0.8884 |
| <i>ODZ1</i>          | 0.0038  | 0.6031 | 0.8891 |
| <i>PIGA</i>          | -0.0036 | 0.6054 | 0.8896 |
| <i>AMMECR1</i>       | -0.0035 | 0.6063 | 0.8896 |
| <i>RAB39B</i>        | 0.0035  | 0.6064 | 0.8897 |
| <i>MAGEE1</i>        | 0.0036  | 0.6065 | 0.8897 |
| <i>EIF2S3</i>        | -0.0034 | 0.6073 | 0.8900 |
| <i>SASH3</i>         | -0.0038 | 0.6113 | 0.8919 |
| <i>KLHL4</i>         | 0.0035  | 0.6115 | 0.8919 |
| <i>APIS2</i>         | 0.0036  | 0.6119 | 0.8921 |
| <i>CD99</i>          | -0.0035 | 0.6121 | 0.8922 |
| <i>BRWD3</i>         | -0.0035 | 0.6148 | 0.8936 |

|                 |         |        |        |
|-----------------|---------|--------|--------|
| <i>XIAP</i>     | -0.0034 | 0.6166 | 0.8941 |
| <i>ACSL4</i>    | 0.0033  | 0.6206 | 0.8955 |
| <i>ZDHHC9</i>   | 0.0036  | 0.6206 | 0.8955 |
| <i>LDOC1</i>    | 0.0033  | 0.6223 | 0.8962 |
| <i>ZXDB</i>     | 0.0034  | 0.6228 | 0.8964 |
| <i>SLC25A14</i> | 0.0034  | 0.6261 | 0.8974 |
| <i>RAB9B</i>    | 0.0032  | 0.6271 | 0.8975 |
| <i>GABRA3</i>   | -0.0033 | 0.6278 | 0.8979 |
| <i>FAM156B</i>  | 0.0034  | 0.6315 | 0.8999 |
| <i>WAS</i>      | 0.0033  | 0.6360 | 0.9014 |
| <i>BCORL1</i>   | -0.0035 | 0.6363 | 0.9015 |
| <i>FAM122C</i>  | 0.0034  | 0.6383 | 0.9024 |
| <i>ATG4A</i>    | -0.0032 | 0.6406 | 0.9031 |
| <i>TIMM17B</i>  | 0.0035  | 0.6419 | 0.9035 |
| <i>RPL36A</i>   | -0.0031 | 0.6444 | 0.9050 |
| <i>KLHL15</i>   | -0.0031 | 0.6462 | 0.9054 |
| <i>MTM1</i>     | -0.0033 | 0.6512 | 0.9071 |
| <i>GPR173</i>   | 0.0032  | 0.6548 | 0.9082 |
| <i>MORF4L2</i>  | 0.0031  | 0.6589 | 0.9092 |
| <i>FRMPD4</i>   | 0.0030  | 0.6602 | 0.9097 |
| <i>MAGEE2</i>   | -0.0029 | 0.6624 | 0.9107 |
| <i>ZNF75D</i>   | 0.0029  | 0.6637 | 0.9112 |
| <i>MAGT1</i>    | 0.0029  | 0.6640 | 0.9112 |
| <i>ABCD1</i>    | -0.0027 | 0.6851 | 0.9193 |
| <i>FATE1</i>    | -0.0026 | 0.6887 | 0.9205 |
| <i>MOSPD1</i>   | -0.0028 | 0.6904 | 0.9210 |
| <i>IL1RAPL1</i> | -0.0029 | 0.6993 | 0.9245 |
| <i>LAGE3</i>    | 0.0026  | 0.7021 | 0.9255 |
| <i>SLC9A6</i>   | -0.0025 | 0.7044 | 0.9266 |
| <i>CHIC1</i>    | -0.0026 | 0.7053 | 0.9269 |
| <i>MTCP1</i>    | 0.0026  | 0.7072 | 0.9277 |
| <i>RPS4X</i>    | 0.0026  | 0.7109 | 0.9289 |
| <i>OFD1</i>     | -0.0025 | 0.7123 | 0.9294 |
| <i>SLITRK4</i>  | -0.0025 | 0.7134 | 0.9297 |
| <i>TIMP1</i>    | -0.0025 | 0.7152 | 0.9299 |
| <i>MAMLD1</i>   | 0.0025  | 0.7216 | 0.9320 |
| <i>FLNA</i>     | 0.0023  | 0.7240 | 0.9330 |
| <i>FAAH2</i>    | -0.0025 | 0.7271 | 0.9341 |
| <i>RPGR</i>     | -0.0025 | 0.7281 | 0.9344 |
| <i>COL4A5</i>   | 0.0024  | 0.7285 | 0.9344 |
| <i>ARMCX6</i>   | 0.0024  | 0.7300 | 0.9346 |
| <i>F8A1</i>     | -0.0021 | 0.7352 | 0.9362 |

|                 |         |        |        |
|-----------------|---------|--------|--------|
| <i>TCEAL3</i>   | -0.0023 | 0.7356 | 0.9363 |
| <i>SEPT</i>     | -0.0023 | 0.7418 | 0.9385 |
| <i>MTCP1NB</i>  | -0.0024 | 0.7435 | 0.9390 |
| <i>GEMIN8</i>   | -0.0023 | 0.7466 | 0.9393 |
| <i>ENOX2</i>    | 0.0022  | 0.7513 | 0.9409 |
| <i>BTK</i>      | 0.0023  | 0.7514 | 0.9410 |
| <i>FUNDC2</i>   | -0.0022 | 0.7569 | 0.9422 |
| <i>RGN</i>      | -0.0021 | 0.7575 | 0.9425 |
| <i>DIAPH2</i>   | 0.0020  | 0.7586 | 0.9427 |
| <i>FGD1</i>     | -0.0021 | 0.7611 | 0.9434 |
| <i>SLC16A2</i>  | 0.0022  | 0.7622 | 0.9436 |
| <i>PIR</i>      | 0.0020  | 0.7626 | 0.9437 |
| <i>ZNF182</i>   | -0.0020 | 0.7632 | 0.9439 |
| <i>GLA</i>      | -0.0020 | 0.7660 | 0.9451 |
| <i>UBL4A</i>    | 0.0022  | 0.7667 | 0.9452 |
| <i>CNKSR2</i>   | -0.0020 | 0.7686 | 0.9454 |
| <i>PDK3</i>     | -0.0019 | 0.7769 | 0.9479 |
| <i>ZMAT1</i>    | 0.0019  | 0.7782 | 0.9480 |
| <i>MTMR1</i>    | -0.0021 | 0.7790 | 0.9482 |
| <i>OCRL</i>     | 0.0018  | 0.7826 | 0.9488 |
| <i>SLITRK2</i>  | -0.0020 | 0.7833 | 0.9488 |
| <i>KCND1</i>    | -0.0017 | 0.7867 | 0.9494 |
| <i>ATP6AP1</i>  | 0.0018  | 0.7883 | 0.9499 |
| <i>PLP2</i>     | -0.0018 | 0.7908 | 0.9505 |
| <i>APOOL</i>    | -0.0018 | 0.7935 | 0.9518 |
| <i>CHST7</i>    | 0.0017  | 0.7992 | 0.9537 |
| <i>SLC25A43</i> | 0.0016  | 0.7992 | 0.9537 |
| <i>DDX3X</i>    | -0.0019 | 0.8023 | 0.9544 |
| <i>ARSF</i>     | -0.0017 | 0.8058 | 0.9555 |
| <i>KAL1</i>     | 0.0017  | 0.8131 | 0.9577 |
| <i>BCAP31</i>   | -0.0016 | 0.8146 | 0.9578 |
| <i>HTATSF1</i>  | -0.0016 | 0.8194 | 0.9585 |
| <i>NKAP</i>     | -0.0017 | 0.8226 | 0.9592 |
| <i>PLCXD1</i>   | -0.0016 | 0.8269 | 0.9603 |
| <i>NLGN4X</i>   | 0.0014  | 0.8342 | 0.9624 |
| <i>RBM41</i>    | 0.0014  | 0.8415 | 0.9642 |
| <i>MSL3</i>     | -0.0014 | 0.8423 | 0.9645 |
| <i>NUDT10</i>   | 0.0014  | 0.8464 | 0.9657 |
| <i>IGBP1</i>    | 0.0013  | 0.8467 | 0.9659 |
| <i>RHOXF1</i>   | -0.0012 | 0.8479 | 0.9663 |
| <i>FAM127C</i>  | -0.0012 | 0.8504 | 0.9667 |
| <i>DACH2</i>    | 0.0014  | 0.8505 | 0.9667 |

|                  |         |        |        |
|------------------|---------|--------|--------|
| <i>DMRTC1</i>    | 0.0012  | 0.8579 | 0.9687 |
| <i>SHROOM4</i>   | 0.0011  | 0.8616 | 0.9702 |
| <i>FAM133A</i>   | 0.0013  | 0.8619 | 0.9702 |
| <i>AMOT</i>      | -0.0012 | 0.8674 | 0.9717 |
| <i>BHLHB9</i>    | 0.0011  | 0.8677 | 0.9717 |
| <i>PCDH11X</i>   | 0.0010  | 0.8761 | 0.9740 |
| <i>UBA1</i>      | -0.0011 | 0.8778 | 0.9745 |
| <i>RBBP7</i>     | -0.0010 | 0.8790 | 0.9748 |
| <i>PPP1R3F</i>   | -0.0011 | 0.8826 | 0.9754 |
| <i>AKAP17A</i>   | -0.0010 | 0.8826 | 0.9754 |
| <i>MPP1</i>      | -0.0010 | 0.8824 | 0.9754 |
| <i>HAUS7</i>     | 0.0010  | 0.8876 | 0.9765 |
| <i>RLIM</i>      | -0.0009 | 0.8900 | 0.9768 |
| <i>MID2</i>      | 0.0010  | 0.8926 | 0.9777 |
| <i>TMSB15B</i>   | -0.0009 | 0.8952 | 0.9783 |
| <i>WDR13</i>     | -0.0010 | 0.8970 | 0.9791 |
| <i>NXT2</i>      | -0.0008 | 0.9033 | 0.9804 |
| <i>MOSPD2</i>    | 0.0008  | 0.9066 | 0.9816 |
| <i>CASK</i>      | -0.0008 | 0.9089 | 0.9817 |
| <i>REPS2</i>     | 0.0008  | 0.9100 | 0.9819 |
| <i>STARD8</i>    | -0.0007 | 0.9148 | 0.9831 |
| <i>KIAA2022</i>  | 0.0007  | 0.9148 | 0.9831 |
| <i>YIPF6</i>     | 0.0007  | 0.9182 | 0.9840 |
| <i>PAK3</i>      | -0.0008 | 0.9185 | 0.9842 |
| <i>ERAS</i>      | -0.0007 | 0.9207 | 0.9847 |
| <i>PLP1</i>      | 0.0007  | 0.9218 | 0.9850 |
| <i>PGK1</i>      | 0.0007  | 0.9230 | 0.9850 |
| <i>MAOB</i>      | -0.0007 | 0.9237 | 0.9851 |
| <i>ZC3H12B</i>   | -0.0006 | 0.9276 | 0.9863 |
| <i>INE1</i>      | -0.0006 | 0.9284 | 0.9865 |
| <i>UBQLN2</i>    | 0.0006  | 0.9291 | 0.9868 |
| <i>FAM58A</i>    | 0.0006  | 0.9311 | 0.9872 |
| <i>ZNF673</i>    | -0.0006 | 0.9312 | 0.9873 |
| <i>PABPC1L2B</i> | 0.0006  | 0.9317 | 0.9874 |
| <i>TRMT2B</i>    | 0.0005  | 0.9319 | 0.9875 |
| <i>TMEM35</i>    | -0.0006 | 0.9320 | 0.9875 |
| <i>F8A2</i>      | -0.0005 | 0.9378 | 0.9883 |
| <i>CYBB</i>      | 0.0006  | 0.9389 | 0.9886 |
| <i>CLCN4</i>     | 0.0005  | 0.9412 | 0.9891 |
| <i>RNF113A</i>   | 0.0005  | 0.9426 | 0.9892 |
| <i>TSPYL2</i>    | -0.0005 | 0.9454 | 0.9895 |
| <i>TBC1D25</i>   | 0.0004  | 0.9474 | 0.9901 |

|                |         |        |        |
|----------------|---------|--------|--------|
| <i>HDAC8</i>   | -0.0004 | 0.9543 | 0.9920 |
| <i>CXorf1</i>  | 0.0003  | 0.9572 | 0.9923 |
| <i>ZC4H2</i>   | -0.0003 | 0.9580 | 0.9926 |
| <i>TRO</i>     | -0.0004 | 0.9586 | 0.9926 |
| <i>KLHL13</i>  | -0.0004 | 0.9601 | 0.9927 |
| <i>MSN</i>     | 0.0003  | 0.9624 | 0.9930 |
| <i>ZNF630</i>  | -0.0003 | 0.9632 | 0.9932 |
| <i>NSDHL</i>   | 0.0003  | 0.9644 | 0.9935 |
| <i>SYN1</i>    | -0.0003 | 0.9642 | 0.9935 |
| <i>NDUFB11</i> | 0.0003  | 0.9647 | 0.9935 |
| <i>MAGEC3</i>  | -0.0003 | 0.9665 | 0.9938 |
| <i>SRPK3</i>   | 0.0003  | 0.9678 | 0.9943 |
| <i>CYSLTR1</i> | -0.0002 | 0.9749 | 0.9954 |
| <i>DCX</i>     | -0.0002 | 0.9730 | 0.9954 |
| <i>IQSEC2</i>  | -0.0002 | 0.9733 | 0.9954 |
| <i>OGT</i>     | 0.0002  | 0.9732 | 0.9954 |
| <i>CDK16</i>   | 0.0002  | 0.9768 | 0.9959 |
| <i>NAA10</i>   | -0.0002 | 0.9813 | 0.9974 |
| <i>FAM104B</i> | -0.0001 | 0.9838 | 0.9975 |
| <i>THOC2</i>   | 0.0002  | 0.9834 | 0.9975 |
| <i>NKRF</i>    | 0.0001  | 0.9878 | 0.9984 |
| <i>DKC1</i>    | 0.0001  | 0.9886 | 0.9986 |
| <i>PCYT1B</i>  | -0.0001 | 0.9920 | 0.9992 |
| <i>ARAF</i>    | -0.0001 | 0.9937 | 0.9993 |
| <i>HCCS</i>    | 0.0000  | 0.9944 | 0.9995 |
| <i>F8A3</i>    | 0.0000  | 0.9970 | 0.9998 |
| <i>PIN4</i>    | 0.0000  | 0.9976 | 0.9998 |
| <i>ATP11C</i>  | 0.0000  | 0.9994 | 0.9999 |

**eTable 4. Global cognitive decline and NFT in men compared to women, adjusted by age and education**

| <b>Measure</b>                   | <b>Beta</b> | <b>Pvalue</b> |
|----------------------------------|-------------|---------------|
| Global cognitive decline (women) | -0.180      | 0.86          |
| NFT (women)                      | -0.056      | 0.07          |

**eTable 5. Association of X chromosome gene expression with neurofibrillary tangles in women, adjusted by age and education. FDR-adjusted p-values for genome-wide correction shown.**

| <b>Gene</b>    | <b>Beta</b> | <b>Pvalue</b> | <b>Pvalue Adjusted</b> |
|----------------|-------------|---------------|------------------------|
| <i>ELK1</i>    | 0.0748      | 0.0001        | 0.1176                 |
| <i>PDZD11</i>  | -0.0675     | 0.0004        | 0.2450                 |
| <i>SMS</i>     | -0.0654     | 0.0005        | 0.2555                 |
| <i>PPEF1</i>   | -0.0610     | 0.0010        | 0.2753                 |
| <i>LONRF3</i>  | 0.0596      | 0.0015        | 0.3155                 |
| <i>FOXO4</i>   | 0.0591      | 0.0019        | 0.3199                 |
| <i>MCTS1</i>   | -0.0557     | 0.0026        | 0.3364                 |
| <i>GPRASP1</i> | -0.0555     | 0.0029        | 0.3430                 |
| <i>MAGED4B</i> | 0.0561      | 0.0028        | 0.3430                 |
| <i>MAGEH1</i>  | -0.0541     | 0.0042        | 0.3665                 |
| <i>FGF13</i>   | -0.0535     | 0.0042        | 0.3665                 |
| <i>RRAGB</i>   | -0.0530     | 0.0046        | 0.3723                 |
| <i>CSTF2</i>   | -0.0536     | 0.0049        | 0.3730                 |
| <i>ATRX</i>    | 0.0505      | 0.0054        | 0.3766                 |
| <i>TMLHE</i>   | -0.0522     | 0.0056        | 0.3787                 |
| <i>ZBED1</i>   | 0.0514      | 0.0058        | 0.3806                 |
| <i>DYNLT3</i>  | -0.0499     | 0.0067        | 0.3965                 |
| <i>COX7B</i>   | -0.0515     | 0.0080        | 0.4038                 |
| <i>OTUD5</i>   | -0.0497     | 0.0111        | 0.4108                 |
| <i>G6PD</i>    | -0.0487     | 0.0102        | 0.4108                 |
| <i>PDHA1</i>   | -0.0502     | 0.0117        | 0.4144                 |
| <i>PRPS1</i>   | -0.0472     | 0.0123        | 0.4190                 |
| <i>NAA10</i>   | -0.0478     | 0.0123        | 0.4190                 |
| <i>ARSE</i>    | 0.0462      | 0.0134        | 0.4228                 |
| <i>HPRT1</i>   | -0.0457     | 0.0139        | 0.4262                 |
| <i>MBTPS2</i>  | -0.0470     | 0.0147        | 0.4287                 |
| <i>PIM2</i>    | -0.0467     | 0.0146        | 0.4287                 |
| <i>TSPAN7</i>  | -0.0466     | 0.0169        | 0.4371                 |
| <i>NHS</i>     | -0.0447     | 0.0184        | 0.4411                 |
| <i>MOSPD1</i>  | 0.0442      | 0.0185        | 0.4416                 |
| <i>TXLNG</i>   | -0.0461     | 0.0195        | 0.4485                 |
| <i>FAM127A</i> | -0.0454     | 0.0204        | 0.4528                 |
| <i>THOC2</i>   | 0.0426      | 0.0212        | 0.4558                 |
| <i>GRIPAP1</i> | -0.0441     | 0.0213        | 0.4558                 |
| <i>PLXNB3</i>  | 0.0434      | 0.0217        | 0.4580                 |
| <i>EIF2S3</i>  | -0.0438     | 0.0218        | 0.4580                 |
| <i>VBPI</i>    | -0.0445     | 0.0231        | 0.4619                 |
| <i>KCNE1L</i>  | 0.0469      | 0.0238        | 0.4646                 |
| <i>MED12</i>   | 0.0436      | 0.0239        | 0.4652                 |
| <i>TSC22D3</i> | 0.0423      | 0.0246        | 0.4663                 |

|                    |         |        |        |
|--------------------|---------|--------|--------|
| <i>PCYT1B</i>      | 0.0422  | 0.0250 | 0.4677 |
| <i>ZNF673</i>      | 0.0433  | 0.0263 | 0.4737 |
| <i>SRPK3</i>       | 0.0411  | 0.0282 | 0.4802 |
| <i>CSF2RA</i>      | 0.0427  | 0.0306 | 0.4806 |
| <i>SPIN2B</i>      | -0.0401 | 0.0291 | 0.4806 |
| <i>HSFX1</i>       | 0.0400  | 0.0310 | 0.4806 |
| <i>CXorf1</i>      | 0.0419  | 0.0299 | 0.4806 |
| <i>KAL1</i>        | -0.0402 | 0.0336 | 0.4806 |
| <i>ATP6AP2</i>     | -0.0403 | 0.0307 | 0.4806 |
| <i>TMSB4X</i>      | -0.0392 | 0.0301 | 0.4806 |
| <i>PQBP1</i>       | 0.0417  | 0.0342 | 0.4822 |
| <i>CCDC120</i>     | 0.0389  | 0.0343 | 0.4825 |
| <i>SCML2</i>       | 0.0382  | 0.0356 | 0.4851 |
| <i>PRAF2</i>       | -0.0394 | 0.0358 | 0.4855 |
| <i>NGFRAP1</i>     | -0.0389 | 0.0373 | 0.4885 |
| <i>UXT</i>         | 0.0401  | 0.0381 | 0.4885 |
| <i>GPRASP2</i>     | -0.0406 | 0.0376 | 0.4885 |
| <i>HCFC1</i>       | 0.0383  | 0.0384 | 0.4885 |
| <i>TSPAN6</i>      | 0.0395  | 0.0383 | 0.4885 |
| <i>ABCD1</i>       | 0.0402  | 0.0402 | 0.4934 |
| <i>BEX4</i>        | -0.0387 | 0.0406 | 0.4938 |
| <i>TAZ</i>         | 0.0393  | 0.0412 | 0.4950 |
| <i>ZCCHC12</i>     | -0.0377 | 0.0472 | 0.5114 |
| <i>BEX2</i>        | -0.0374 | 0.0473 | 0.5116 |
| <i>GABRE</i>       | -0.0365 | 0.0511 | 0.5207 |
| <i>PDK3</i>        | -0.0370 | 0.0553 | 0.5318 |
| <i>PGK1</i>        | -0.0348 | 0.0577 | 0.5349 |
| <i>TSR2</i>        | -0.0355 | 0.0598 | 0.5407 |
| <i>ZDHHC9</i>      | 0.0348  | 0.0600 | 0.5408 |
| <i>HDHD1</i>       | 0.0369  | 0.0606 | 0.5420 |
| <i>VMA21</i>       | -0.0349 | 0.0619 | 0.5431 |
| <i>SYTL4</i>       | 0.0341  | 0.0652 | 0.5491 |
| <i>AKAP17A</i>     | 0.0352  | 0.0656 | 0.5501 |
| <i>TIMM8A</i>      | -0.0367 | 0.0675 | 0.5530 |
| <i>RAB9A</i>       | 0.0344  | 0.0687 | 0.5552 |
| <i>CCDC160</i>     | 0.0335  | 0.0693 | 0.5564 |
| <i>TRAPPC2</i>     | 0.0341  | 0.0700 | 0.5574 |
| <i>TBC1D8B</i>     | 0.0351  | 0.0709 | 0.5587 |
| <i>RPI-177G6.2</i> | 0.0335  | 0.0727 | 0.5602 |
| <i>CXorf38</i>     | -0.0324 | 0.0739 | 0.5627 |
| <i>ACSL4</i>       | -0.0343 | 0.0766 | 0.5696 |
| <i>PHF16</i>       | 0.0343  | 0.0766 | 0.5696 |

|                      |         |        |        |
|----------------------|---------|--------|--------|
| <i>MID2</i>          | -0.0326 | 0.0775 | 0.5705 |
| <i>GK</i>            | -0.0324 | 0.0771 | 0.5705 |
| <i>TAF9B</i>         | -0.0328 | 0.0781 | 0.5718 |
| <i>RLIM</i>          | -0.0335 | 0.0783 | 0.5726 |
| <i>IL1RAPL1</i>      | 0.0318  | 0.0791 | 0.5736 |
| <i>SRPX</i>          | 0.0334  | 0.0808 | 0.5739 |
| <i>EMD</i>           | -0.0325 | 0.0822 | 0.5748 |
| <i>SHROOM2</i>       | -0.0342 | 0.0830 | 0.5757 |
| <i>GNL3L</i>         | -0.0328 | 0.0857 | 0.5796 |
| <i>FAM156B</i>       | -0.0322 | 0.0865 | 0.5801 |
| <i>HS6ST2</i>        | -0.0332 | 0.0872 | 0.5811 |
| <i>SLC9A7</i>        | -0.0343 | 0.0878 | 0.5824 |
| <i>HMG5</i>          | 0.0322  | 0.0884 | 0.5844 |
| <i>RNF128</i>        | -0.0316 | 0.0894 | 0.5868 |
| <i>AL158821.1</i>    | 0.0328  | 0.0913 | 0.5891 |
| <i>ASMTL</i>         | -0.0314 | 0.0954 | 0.5947 |
| <i>PLP1</i>          | 0.0314  | 0.0978 | 0.5991 |
| <i>LAGE3</i>         | -0.0309 | 0.0985 | 0.6005 |
| <i>GPR173</i>        | 0.0305  | 0.1021 | 0.6019 |
| <i>CXorf24</i>       | 0.0323  | 0.1025 | 0.6029 |
| <i>F8</i>            | -0.0316 | 0.1031 | 0.6044 |
| <i>RP11-274K13.2</i> | -0.0315 | 0.1035 | 0.6046 |
| <i>NDUFB11</i>       | -0.0309 | 0.1035 | 0.6046 |
| <i>CITED1</i>        | -0.0295 | 0.1055 | 0.6080 |
| <i>RBMX</i>          | -0.0313 | 0.1057 | 0.6081 |
| <i>ZNF674</i>        | -0.0306 | 0.1059 | 0.6086 |
| <i>SSR4</i>          | -0.0317 | 0.1122 | 0.6166 |
| <i>RPL10</i>         | -0.0301 | 0.1140 | 0.6196 |
| <i>PRKX</i>          | 0.0310  | 0.1150 | 0.6208 |
| <i>ATP6AP1</i>       | -0.0306 | 0.1152 | 0.6208 |
| <i>MTCP1NB</i>       | 0.0294  | 0.1156 | 0.6213 |
| <i>KDM6A</i>         | 0.0279  | 0.1180 | 0.6245 |
| <i>SPIN3</i>         | -0.0299 | 0.1217 | 0.6278 |
| <i>MSL3</i>          | 0.0294  | 0.1226 | 0.6286 |
| <i>CLIC2</i>         | -0.0287 | 0.1231 | 0.6292 |
| <i>SLC6A8</i>        | 0.0292  | 0.1230 | 0.6292 |
| <i>SMCIA</i>         | 0.0275  | 0.1230 | 0.6292 |
| <i>PSMD10</i>        | -0.0281 | 0.1229 | 0.6292 |
| <i>CXorf69</i>       | 0.0283  | 0.1245 | 0.6309 |
| <i>RAP2C</i>         | -0.0300 | 0.1248 | 0.6316 |
| <i>ARSF</i>          | 0.0283  | 0.1257 | 0.6327 |
| <i>ZFX</i>           | 0.0293  | 0.1260 | 0.6328 |

|                 |         |        |        |
|-----------------|---------|--------|--------|
| <i>ZXDB</i>     | -0.0290 | 0.1271 | 0.6346 |
| <i>F8A2</i>     | 0.0297  | 0.1304 | 0.6368 |
| <i>NAP1L2</i>   | -0.0283 | 0.1304 | 0.6368 |
| <i>CXorf56</i>  | -0.0290 | 0.1318 | 0.6377 |
| <i>F8A3</i>     | 0.0296  | 0.1333 | 0.6401 |
| <i>DNASE1L1</i> | -0.0296 | 0.1359 | 0.6425 |
| <i>SYP</i>      | -0.0281 | 0.1362 | 0.6425 |
| <i>ZMYM3</i>    | 0.0279  | 0.1365 | 0.6430 |
| <i>CXorf36</i>  | 0.0280  | 0.1365 | 0.6430 |
| <i>PORCN</i>    | -0.0282 | 0.1435 | 0.6530 |
| <i>NAP1L3</i>   | -0.0275 | 0.1475 | 0.6552 |
| <i>CNKSR2</i>   | 0.0281  | 0.1470 | 0.6552 |
| <i>GPC4</i>     | 0.0262  | 0.1484 | 0.6571 |
| <i>MED14</i>    | -0.0271 | 0.1557 | 0.6664 |
| <i>GJB1</i>     | 0.0276  | 0.1613 | 0.6710 |
| <i>ARMCX2</i>   | -0.0267 | 0.1619 | 0.6714 |
| <i>CXorf23</i>  | 0.0263  | 0.1632 | 0.6723 |
| <i>GLA</i>      | 0.0263  | 0.1653 | 0.6741 |
| <i>RENBP</i>    | 0.0264  | 0.1659 | 0.6741 |
| <i>RBM3</i>     | -0.0261 | 0.1673 | 0.6755 |
| <i>POLA1</i>    | 0.0251  | 0.1692 | 0.6776 |
| <i>RBBP7</i>    | 0.0273  | 0.1693 | 0.6776 |
| <i>WWC3</i>     | 0.0273  | 0.1716 | 0.6797 |
| <i>SCML1</i>    | -0.0258 | 0.1730 | 0.6813 |
| <i>YIPF6</i>    | 0.0253  | 0.1750 | 0.6835 |
| <i>TCEAL5</i>   | -0.0249 | 0.1757 | 0.6846 |
| <i>RPGR</i>     | 0.0258  | 0.1770 | 0.6859 |
| <i>ENOX2</i>    | 0.0260  | 0.1802 | 0.6895 |
| <i>BRWD3</i>    | 0.0257  | 0.1815 | 0.6909 |
| <i>CASK</i>     | -0.0253 | 0.1855 | 0.6946 |
| <i>MMGT1</i>    | -0.0252 | 0.1888 | 0.6962 |
| <i>PHF8</i>     | 0.0247  | 0.1912 | 0.6975 |
| <i>CXorf26</i>  | 0.0252  | 0.1927 | 0.6985 |
| <i>UPF3B</i>    | 0.0236  | 0.1935 | 0.6995 |
| <i>USP9X</i>    | -0.0238 | 0.1956 | 0.7020 |
| <i>APOOL</i>    | -0.0247 | 0.1985 | 0.7043 |
| <i>ABCB7</i>    | -0.0233 | 0.2015 | 0.7063 |
| <i>FAM155B</i>  | 0.0248  | 0.2027 | 0.7072 |
| <i>AP1S2</i>    | -0.0237 | 0.2029 | 0.7073 |
| <i>GEMIN8</i>   | -0.0238 | 0.2054 | 0.7094 |
| <i>KLF8</i>     | -0.0233 | 0.2059 | 0.7099 |
| <i>VAMP7</i>    | -0.0232 | 0.2092 | 0.7128 |

|                 |         |        |        |
|-----------------|---------|--------|--------|
| <i>SLC25A5</i>  | -0.0235 | 0.2123 | 0.7152 |
| <i>XIAP</i>     | -0.0232 | 0.2181 | 0.7201 |
| <i>GDII</i>     | -0.0225 | 0.2188 | 0.7205 |
| <i>PLS3</i>     | -0.0232 | 0.2187 | 0.7205 |
| <i>SLC25A14</i> | -0.0231 | 0.2205 | 0.7222 |
| <i>HNRNPH2</i>  | -0.0229 | 0.2233 | 0.7241 |
| <i>CHRDL1</i>   | -0.0228 | 0.2230 | 0.7241 |
| <i>ZC3H12B</i>  | 0.0232  | 0.2232 | 0.7241 |
| <i>FAM127C</i>  | 0.0241  | 0.2258 | 0.7260 |
| <i>FUNDC2</i>   | 0.0228  | 0.2260 | 0.7261 |
| <i>PLCXD1</i>   | 0.0218  | 0.2299 | 0.7293 |
| <i>FATE1</i>    | 0.0241  | 0.2301 | 0.7296 |
| <i>PLP2</i>     | 0.0224  | 0.2358 | 0.7336 |
| <i>ZBTB33</i>   | -0.0222 | 0.2369 | 0.7336 |
| <i>DLG3</i>     | -0.0225 | 0.2365 | 0.7336 |
| <i>NKRF</i>     | -0.0224 | 0.2379 | 0.7336 |
| <i>APOO</i>     | -0.0217 | 0.2411 | 0.7353 |
| <i>FRMPD3</i>   | -0.0225 | 0.2411 | 0.7353 |
| <i>PCDH11X</i>  | -0.0227 | 0.2414 | 0.7354 |
| <i>NXT2</i>     | 0.0221  | 0.2426 | 0.7363 |
| <i>APLN</i>     | 0.0211  | 0.2465 | 0.7373 |
| <i>IRAK1</i>    | 0.0221  | 0.2457 | 0.7373 |
| <i>FGD1</i>     | 0.0222  | 0.2475 | 0.7378 |
| <i>PNPLA4</i>   | -0.0215 | 0.2482 | 0.7383 |
| <i>USP11</i>    | -0.0216 | 0.2528 | 0.7414 |
| <i>MAGEE1</i>   | -0.0214 | 0.2549 | 0.7427 |
| <i>PPP2R3B</i>  | 0.0212  | 0.2558 | 0.7437 |
| <i>MORF4L2</i>  | -0.0215 | 0.2559 | 0.7438 |
| <i>SLC25A43</i> | -0.0227 | 0.2568 | 0.7440 |
| <i>SH3KBP1</i>  | -0.0228 | 0.2571 | 0.7440 |
| <i>MAGED2</i>   | -0.0213 | 0.2579 | 0.7440 |
| <i>MORC4</i>    | 0.0215  | 0.2590 | 0.7447 |
| <i>ARMCX6</i>   | 0.0213  | 0.2620 | 0.7467 |
| <i>PRRG1</i>    | 0.0215  | 0.2624 | 0.7471 |
| <i>FAM3A</i>    | -0.0208 | 0.2648 | 0.7492 |
| <i>ALG13</i>    | -0.0212 | 0.2654 | 0.7498 |
| <i>UBL4A</i>    | 0.0206  | 0.2659 | 0.7499 |
| <i>ATP2B3</i>   | -0.0215 | 0.2668 | 0.7504 |
| <i>UBE2A</i>    | -0.0211 | 0.2693 | 0.7518 |
| <i>FAM156A</i>  | -0.0212 | 0.2692 | 0.7518 |
| <i>MID1IP1</i>  | 0.0215  | 0.2698 | 0.7522 |
| <i>SLC25A6</i>  | -0.0213 | 0.2737 | 0.7552 |

|                |         |        |        |
|----------------|---------|--------|--------|
| <i>WDR45</i>   | 0.0204  | 0.2739 | 0.7554 |
| <i>RPS6KA3</i> | -0.0212 | 0.2755 | 0.7555 |
| <i>OPHN1</i>   | -0.0199 | 0.2779 | 0.7563 |
| <i>UTP14A</i>  | 0.0214  | 0.2787 | 0.7568 |
| <i>IDS</i>     | -0.0208 | 0.2795 | 0.7570 |
| <i>BEX1</i>    | -0.0205 | 0.2795 | 0.7570 |
| <i>ARMCX4</i>  | -0.0207 | 0.2804 | 0.7574 |
| <i>DMRTC1B</i> | 0.0202  | 0.2822 | 0.7599 |
| <i>STARD8</i>  | 0.0201  | 0.2864 | 0.7621 |
| <i>GPKOW</i>   | -0.0191 | 0.2865 | 0.7621 |
| <i>SLC16A2</i> | -0.0199 | 0.2869 | 0.7625 |
| <i>ARHGEF9</i> | -0.0205 | 0.2880 | 0.7631 |
| <i>COL4A5</i>  | 0.0200  | 0.2884 | 0.7635 |
| <i>MECP2</i>   | 0.0206  | 0.2888 | 0.7637 |
| <i>PCDH19</i>  | 0.0193  | 0.2909 | 0.7651 |
| <i>TCEAL7</i>  | -0.0203 | 0.2925 | 0.7666 |
| <i>SEPT</i>    | -0.0200 | 0.2979 | 0.7689 |
| <i>MAGT1</i>   | -0.0200 | 0.2991 | 0.7697 |
| <i>TIMM17B</i> | -0.0190 | 0.2992 | 0.7697 |
| <i>PNMA3</i>   | -0.0193 | 0.3037 | 0.7711 |
| <i>ARX</i>     | -0.0200 | 0.3036 | 0.7711 |
| <i>ARMCX5</i>  | -0.0196 | 0.3042 | 0.7714 |
| <i>FIGF</i>    | 0.0198  | 0.3051 | 0.7714 |
| <i>EIF1AX</i>  | -0.0194 | 0.3077 | 0.7723 |
| <i>RGN</i>     | -0.0194 | 0.3088 | 0.7731 |
| <i>KLHL13</i>  | 0.0191  | 0.3111 | 0.7752 |
| <i>INE1</i>    | -0.0188 | 0.3135 | 0.7767 |
| <i>IKBKG</i>   | -0.0191 | 0.3146 | 0.7777 |
| <i>PNMA6C</i>  | 0.0211  | 0.3161 | 0.7784 |
| <i>PRRG3</i>   | -0.0200 | 0.3173 | 0.7791 |
| <i>MAP7D2</i>  | -0.0188 | 0.3187 | 0.7807 |
| <i>SLC35A2</i> | -0.0191 | 0.3202 | 0.7814 |
| <i>LAMP2</i>   | 0.0188  | 0.3220 | 0.7823 |
| <i>AMMECR1</i> | 0.0186  | 0.3252 | 0.7840 |
| <i>NONO</i>    | 0.0175  | 0.3318 | 0.7878 |
| <i>FAM50A</i>  | 0.0183  | 0.3374 | 0.7913 |
| <i>RBM41</i>   | 0.0179  | 0.3427 | 0.7945 |
| <i>SLC38A5</i> | 0.0174  | 0.3439 | 0.7951 |
| <i>WDR13</i>   | -0.0172 | 0.3464 | 0.7955 |
| <i>GPM6B</i>   | 0.0177  | 0.3470 | 0.7960 |
| <i>GDPD2</i>   | 0.0174  | 0.3480 | 0.7964 |
| <i>ZNF81</i>   | -0.0178 | 0.3506 | 0.7982 |

|                  |         |        |        |
|------------------|---------|--------|--------|
| <i>CIGALTIC1</i> | 0.0171  | 0.3510 | 0.7984 |
| <i>DRP2</i>      | -0.0174 | 0.3640 | 0.8039 |
| <i>KLHL15</i>    | -0.0173 | 0.3662 | 0.8048 |
| <i>FAM127B</i>   | 0.0176  | 0.3687 | 0.8058 |
| <i>FAM199X</i>   | -0.0172 | 0.3697 | 0.8062 |
| <i>NSDHL</i>     | -0.0170 | 0.3712 | 0.8068 |
| <i>PIR</i>       | -0.0180 | 0.3736 | 0.8083 |
| <i>ZNF75D</i>    | -0.0174 | 0.3739 | 0.8083 |
| <i>BCORL1</i>    | 0.0162  | 0.3775 | 0.8106 |
| <i>NKAP</i>      | 0.0160  | 0.3777 | 0.8108 |
| <i>DIAPH2</i>    | -0.0175 | 0.3779 | 0.8109 |
| <i>HDAC8</i>     | 0.0171  | 0.3790 | 0.8115 |
| <i>CXorf40B</i>  | -0.0168 | 0.3810 | 0.8120 |
| <i>RAB33A</i>    | 0.0171  | 0.3806 | 0.8120 |
| <i>ARAF</i>      | 0.0163  | 0.3855 | 0.8144 |
| <i>GRIA3</i>     | -0.0170 | 0.3869 | 0.8152 |
| <i>CYSLTR1</i>   | 0.0162  | 0.3901 | 0.8174 |
| <i>TAF1</i>      | -0.0158 | 0.3903 | 0.8177 |
| <i>FAM122B</i>   | -0.0165 | 0.3908 | 0.8178 |
| <i>STAG2</i>     | 0.0166  | 0.3979 | 0.8200 |
| <i>MAOA</i>      | -0.0159 | 0.3986 | 0.8205 |
| <i>ZNF182</i>    | 0.0164  | 0.4001 | 0.8209 |
| <i>BTK</i>       | -0.0157 | 0.4004 | 0.8210 |
| <i>KLHL4</i>     | 0.0160  | 0.4060 | 0.8242 |
| <i>ZNF630</i>    | -0.0160 | 0.4072 | 0.8246 |
| <i>TSPYL2</i>    | -0.0158 | 0.4147 | 0.8293 |
| <i>CHM</i>       | 0.0156  | 0.4216 | 0.8323 |
| <i>AFF2</i>      | -0.0157 | 0.4290 | 0.8356 |
| <i>SLC25A53</i>  | -0.0151 | 0.4303 | 0.8363 |
| <i>MAOB</i>      | -0.0140 | 0.4352 | 0.8382 |
| <i>SH3BGRL</i>   | -0.0140 | 0.4391 | 0.8399 |
| <i>GPR143</i>    | -0.0147 | 0.4395 | 0.8400 |
| <i>AMOT</i>      | 0.0144  | 0.4410 | 0.8403 |
| <i>NLGN3</i>     | 0.0142  | 0.4445 | 0.8421 |
| <i>PGRMC1</i>    | -0.0150 | 0.4450 | 0.8421 |
| <i>CYBB</i>      | -0.0138 | 0.4466 | 0.8424 |
| <i>PNMA5</i>     | -0.0142 | 0.4533 | 0.8459 |
| <i>RPL36A</i>    | 0.0145  | 0.4542 | 0.8468 |
| <i>PRPS2</i>     | -0.0143 | 0.4547 | 0.8474 |
| <i>IQSEC2</i>    | 0.0140  | 0.4560 | 0.8480 |
| <i>KCND1</i>     | -0.0148 | 0.4593 | 0.8487 |
| <i>ATG4A</i>     | -0.0140 | 0.4637 | 0.8510 |

|                  |         |        |        |
|------------------|---------|--------|--------|
| <i>PDZD4</i>     | -0.0140 | 0.4642 | 0.8512 |
| <i>FAM104B</i>   | 0.0137  | 0.4665 | 0.8525 |
| <i>OCRL</i>      | 0.0141  | 0.4694 | 0.8534 |
| <i>ARSD</i>      | 0.0136  | 0.4695 | 0.8534 |
| <i>MSN</i>       | -0.0131 | 0.4703 | 0.8538 |
| <i>FHL1</i>      | -0.0131 | 0.4714 | 0.8543 |
| <i>SLC10A3</i>   | 0.0137  | 0.4731 | 0.8548 |
| <i>HDAC6</i>     | 0.0132  | 0.4766 | 0.8559 |
| <i>GYG2</i>      | 0.0128  | 0.4828 | 0.8586 |
| <i>MAGED1</i>    | -0.0133 | 0.4827 | 0.8586 |
| <i>BHLHB9</i>    | -0.0134 | 0.4844 | 0.8598 |
| <i>BEX5</i>      | -0.0127 | 0.4894 | 0.8621 |
| <i>SUV39H1</i>   | 0.0130  | 0.4954 | 0.8643 |
| <i>PABPC1L2A</i> | -0.0131 | 0.4971 | 0.8652 |
| <i>MPP1</i>      | -0.0130 | 0.4982 | 0.8659 |
| <i>SLITRK4</i>   | 0.0132  | 0.4983 | 0.8660 |
| <i>FAM133A</i>   | 0.0121  | 0.5012 | 0.8672 |
| <i>EBP</i>       | -0.0125 | 0.5015 | 0.8673 |
| <i>PIGA</i>      | -0.0123 | 0.5077 | 0.8698 |
| <i>PCSKIN</i>    | -0.0121 | 0.5110 | 0.8716 |
| <i>LRCH2</i>     | -0.0127 | 0.5132 | 0.8724 |
| <i>DDX3X</i>     | 0.0119  | 0.5127 | 0.8724 |
| <i>CSAG1</i>     | 0.0127  | 0.5141 | 0.8728 |
| <i>CD99</i>      | 0.0121  | 0.5203 | 0.8752 |
| <i>ZNF449</i>    | -0.0123 | 0.5241 | 0.8768 |
| <i>HMGB3</i>     | -0.0121 | 0.5256 | 0.8768 |
| <i>FAM58A</i>    | 0.0117  | 0.5271 | 0.8772 |
| <i>MAP7D3</i>    | 0.0119  | 0.5299 | 0.8777 |
| <i>PTCHD1</i>    | 0.0119  | 0.5343 | 0.8791 |
| <i>ERAS</i>      | -0.0117 | 0.5360 | 0.8797 |
| <i>MAGIX</i>     | -0.0114 | 0.5402 | 0.8815 |
| <i>FUNDC1</i>    | -0.0113 | 0.5440 | 0.8828 |
| <i>VSIG4</i>     | -0.0110 | 0.5449 | 0.8834 |
| <i>MID1</i>      | -0.0112 | 0.5450 | 0.8835 |
| <i>TCEAL6</i>    | -0.0111 | 0.5607 | 0.8880 |
| <i>SMPX</i>      | 0.0109  | 0.5660 | 0.8895 |
| <i>DHR SX</i>    | 0.0109  | 0.5652 | 0.8895 |
| <i>NDP</i>       | -0.0107 | 0.5677 | 0.8903 |
| <i>MAGEE2</i>    | -0.0109 | 0.5748 | 0.8920 |
| <i>SYN1</i>      | 0.0108  | 0.5783 | 0.8932 |
| <i>PABPC1L2B</i> | -0.0105 | 0.5858 | 0.8959 |
| <i>FAM70A</i>    | -0.0104 | 0.5864 | 0.8962 |

|                      |         |        |        |
|----------------------|---------|--------|--------|
| <i>RBMX2</i>         | -0.0102 | 0.5877 | 0.8965 |
| <i>PHKA1</i>         | -0.0103 | 0.5906 | 0.8981 |
| <i>WBP5</i>          | 0.0103  | 0.5911 | 0.8982 |
| <i>IL13RA1</i>       | 0.0101  | 0.5921 | 0.8984 |
| <i>RAB9B</i>         | -0.0105 | 0.5925 | 0.8985 |
| <i>CUL4B</i>         | 0.0100  | 0.5932 | 0.8987 |
| <i>TBLIX</i>         | 0.0097  | 0.5965 | 0.8998 |
| <i>UBA1</i>          | 0.0099  | 0.5990 | 0.9010 |
| <i>FAM120C</i>       | 0.0096  | 0.5991 | 0.9010 |
| <i>TFE3</i>          | -0.0096 | 0.6031 | 0.9017 |
| <i>BRCC3</i>         | -0.0100 | 0.6039 | 0.9017 |
| <i>RHOXF1</i>        | -0.0109 | 0.6086 | 0.9035 |
| <i>PLXNA3</i>        | -0.0099 | 0.6108 | 0.9047 |
| <i>ARHGEF6</i>       | 0.0092  | 0.6121 | 0.9051 |
| <i>PNCK</i>          | -0.0095 | 0.6171 | 0.9075 |
| <i>ATP11C</i>        | 0.0092  | 0.6194 | 0.9083 |
| <i>TMSB15B</i>       | 0.0093  | 0.6281 | 0.9110 |
| <i>OGT</i>           | -0.0088 | 0.6378 | 0.9134 |
| <i>RBM10</i>         | -0.0091 | 0.6388 | 0.9136 |
| <i>FAM122C</i>       | -0.0085 | 0.6399 | 0.9141 |
| <i>CXorf40A</i>      | -0.0091 | 0.6440 | 0.9150 |
| <i>RP11-706O15.1</i> | -0.0085 | 0.6443 | 0.9152 |
| <i>IGSF1</i>         | 0.0089  | 0.6444 | 0.9153 |
| <i>DUSP9</i>         | 0.0085  | 0.6475 | 0.9158 |
| <i>ITM2A</i>         | 0.0085  | 0.6510 | 0.9165 |
| <i>MOSPD2</i>        | 0.0086  | 0.6584 | 0.9194 |
| <i>IL2RG</i>         | -0.0079 | 0.6600 | 0.9195 |
| <i>MTCP1</i>         | 0.0081  | 0.6609 | 0.9199 |
| <i>PPP1R3F</i>       | -0.0081 | 0.6620 | 0.9203 |
| <i>MCF2</i>          | -0.0081 | 0.6657 | 0.9217 |
| <i>USP51</i>         | 0.0079  | 0.6661 | 0.9217 |
| <i>BCOR</i>          | 0.0079  | 0.6695 | 0.9236 |
| <i>ZMAT1</i>         | -0.0081 | 0.6717 | 0.9241 |
| <i>ZDHHC15</i>       | -0.0084 | 0.6719 | 0.9241 |
| <i>SLC9A6</i>        | 0.0082  | 0.6760 | 0.9257 |
| <i>DACH2</i>         | -0.0077 | 0.6806 | 0.9266 |
| <i>PHF6</i>          | 0.0077  | 0.6792 | 0.9266 |
| <i>CDKL5</i>         | -0.0079 | 0.6878 | 0.9285 |
| <i>ACRC</i>          | -0.0074 | 0.6890 | 0.9289 |
| <i>UPRT</i>          | -0.0075 | 0.6921 | 0.9299 |
| <i>TRO</i>           | -0.0072 | 0.6961 | 0.9313 |
| <i>TAB3</i>          | -0.0076 | 0.6959 | 0.9313 |

|                 |         |        |        |
|-----------------|---------|--------|--------|
| <i>EFHC2</i>    | 0.0073  | 0.6972 | 0.9313 |
| <i>XK</i>       | -0.0073 | 0.7017 | 0.9325 |
| <i>ACOT9</i>    | 0.0074  | 0.7023 | 0.9325 |
| <i>AIFM1</i>    | 0.0073  | 0.7015 | 0.9325 |
| <i>PHKA2</i>    | 0.0074  | 0.7062 | 0.9335 |
| <i>MUMIL1</i>   | -0.0073 | 0.7052 | 0.9335 |
| <i>TCEANC</i>   | -0.0074 | 0.7074 | 0.9337 |
| <i>RAI2</i>     | 0.0071  | 0.7098 | 0.9345 |
| <i>DDX26B</i>   | -0.0070 | 0.7128 | 0.9352 |
| <i>PRICKLE3</i> | -0.0068 | 0.7174 | 0.9367 |
| <i>NLGN4X</i>   | -0.0070 | 0.7184 | 0.9369 |
| <i>FLNA</i>     | -0.0070 | 0.7233 | 0.9390 |
| <i>MAMLD1</i>   | -0.0067 | 0.7260 | 0.9395 |
| <i>TRMT2B</i>   | 0.0070  | 0.7297 | 0.9408 |
| <i>ARMCX1</i>   | -0.0065 | 0.7303 | 0.9410 |
| <i>ZRSR2</i>    | 0.0066  | 0.7321 | 0.9415 |
| <i>EFNB1</i>    | 0.0067  | 0.7339 | 0.9419 |
| <i>SAT1</i>     | -0.0065 | 0.7348 | 0.9424 |
| <i>CFP</i>      | 0.0065  | 0.7385 | 0.9434 |
| <i>UBQLN2</i>   | -0.0064 | 0.7465 | 0.9458 |
| <i>TBC1D25</i>  | -0.0063 | 0.7487 | 0.9469 |
| <i>RPS4X</i>    | 0.0059  | 0.7560 | 0.9482 |
| <i>HAUS7</i>    | -0.0056 | 0.7632 | 0.9497 |
| <i>WAS</i>      | -0.0056 | 0.7716 | 0.9530 |
| <i>MTM1</i>     | -0.0052 | 0.7730 | 0.9534 |
| <i>LDOC1</i>    | 0.0054  | 0.7830 | 0.9564 |
| <i>SPIN2A</i>   | -0.0054 | 0.7822 | 0.9564 |
| <i>DMD</i>      | -0.0051 | 0.7895 | 0.9584 |
| <i>SLITRK2</i>  | -0.0050 | 0.7889 | 0.9584 |
| <i>HTATSF1</i>  | 0.0049  | 0.7960 | 0.9592 |
| <i>CTPS2</i>    | -0.0048 | 0.7953 | 0.9592 |
| <i>TCEAL1</i>   | 0.0048  | 0.8024 | 0.9600 |
| <i>REPS2</i>    | -0.0048 | 0.8052 | 0.9605 |
| <i>TCEAL8</i>   | 0.0047  | 0.8052 | 0.9605 |
| <i>GPR34</i>    | -0.0045 | 0.8080 | 0.9613 |
| <i>RAB39B</i>   | 0.0046  | 0.8090 | 0.9618 |
| <i>HEPH</i>     | 0.0045  | 0.8122 | 0.9624 |
| <i>FRMPD4</i>   | -0.0044 | 0.8236 | 0.9652 |
| <i>STS</i>      | -0.0044 | 0.8240 | 0.9652 |
| <i>DMRTC1</i>   | 0.0044  | 0.8250 | 0.9653 |
| <i>IL3RA</i>    | 0.0042  | 0.8258 | 0.9653 |
| <i>ZC4H2</i>    | 0.0044  | 0.8252 | 0.9653 |

|                 |         |        |        |
|-----------------|---------|--------|--------|
| <i>SYAP1</i>    | -0.0042 | 0.8269 | 0.9655 |
| <i>BCAP31</i>   | -0.0042 | 0.8274 | 0.9657 |
| <i>WDR44</i>    | -0.0040 | 0.8319 | 0.9664 |
| <i>TMEM35</i>   | 0.0039  | 0.8348 | 0.9672 |
| <i>DCX</i>      | -0.0039 | 0.8356 | 0.9672 |
| <i>NUDT11</i>   | 0.0039  | 0.8370 | 0.9675 |
| <i>RIBC1</i>    | 0.0038  | 0.8394 | 0.9683 |
| <i>SHROOM4</i>  | 0.0039  | 0.8401 | 0.9684 |
| <i>TMEM164</i>  | -0.0038 | 0.8404 | 0.9685 |
| <i>CLCN4</i>    | -0.0037 | 0.8477 | 0.9696 |
| <i>LAS1L</i>    | -0.0036 | 0.8489 | 0.9698 |
| <i>RGAG4</i>    | -0.0037 | 0.8486 | 0.9698 |
| <i>TMEM185A</i> | -0.0036 | 0.8520 | 0.9705 |
| <i>TMEM187</i>  | 0.0033  | 0.8592 | 0.9721 |
| <i>PRDX4</i>    | 0.0033  | 0.8589 | 0.9721 |
| <i>TCEAL4</i>   | -0.0033 | 0.8614 | 0.9726 |
| <i>ARHGAP4</i>  | 0.0033  | 0.8625 | 0.9728 |
| <i>CXorf57</i>  | -0.0032 | 0.8677 | 0.9740 |
| <i>GTPBP6</i>   | -0.0031 | 0.8673 | 0.9740 |
| <i>CETN2</i>    | -0.0032 | 0.8681 | 0.9740 |
| <i>GABRA3</i>   | 0.0032  | 0.8680 | 0.9740 |
| <i>DKC1</i>     | 0.0031  | 0.8722 | 0.9750 |
| <i>FAAH2</i>    | -0.0030 | 0.8729 | 0.9750 |
| <i>APEX2</i>    | -0.0030 | 0.8752 | 0.9756 |
| <i>ZNF185</i>   | -0.0031 | 0.8771 | 0.9759 |
| <i>MAGED4</i>   | -0.0030 | 0.8804 | 0.9767 |
| <i>TCEAL3</i>   | -0.0028 | 0.8816 | 0.9771 |
| <i>FAM123B</i>  | 0.0026  | 0.8883 | 0.9786 |
| <i>SASH3</i>    | 0.0026  | 0.8889 | 0.9786 |
| <i>CCDC22</i>   | 0.0026  | 0.8937 | 0.9796 |
| <i>RPL39</i>    | 0.0025  | 0.8964 | 0.9800 |
| <i>NDUFA1</i>   | -0.0024 | 0.9008 | 0.9810 |
| <i>PAK3</i>     | 0.0023  | 0.9015 | 0.9812 |
| <i>KDM5C</i>    | -0.0023 | 0.9023 | 0.9813 |
| <i>ZNF41</i>    | 0.0023  | 0.9052 | 0.9816 |
| <i>KIAA2022</i> | -0.0022 | 0.9091 | 0.9820 |
| <i>PIN4</i>     | 0.0020  | 0.9158 | 0.9832 |
| <i>CDK16</i>    | -0.0020 | 0.9170 | 0.9834 |
| <i>IDH3G</i>    | -0.0019 | 0.9178 | 0.9838 |
| <i>HCCS</i>     | 0.0019  | 0.9196 | 0.9845 |
| <i>LICAM</i>    | -0.0019 | 0.9196 | 0.9845 |
| <i>TCEAL2</i>   | 0.0019  | 0.9201 | 0.9846 |

|                 |         |        |        |
|-----------------|---------|--------|--------|
| <i>MTMRI</i>    | -0.0017 | 0.9278 | 0.9859 |
| <i>CD99L2</i>   | 0.0017  | 0.9318 | 0.9861 |
| <i>OFD1</i>     | -0.0016 | 0.9327 | 0.9861 |
| <i>PNMA6A</i>   | 0.0017  | 0.9301 | 0.9861 |
| <i>ZNF711</i>   | 0.0016  | 0.9341 | 0.9864 |
| <i>ARMCX3</i>   | -0.0015 | 0.9372 | 0.9872 |
| <i>F8A1</i>     | -0.0014 | 0.9452 | 0.9892 |
| <i>SNX12</i>    | 0.0013  | 0.9456 | 0.9892 |
| <i>CA5B</i>     | 0.0013  | 0.9456 | 0.9892 |
| <i>HSD17B10</i> | -0.0013 | 0.9463 | 0.9892 |
| <i>PJA1</i>     | -0.0013 | 0.9467 | 0.9892 |
| <i>BGN</i>      | -0.0012 | 0.9483 | 0.9894 |
| <i>WASH6P</i>   | -0.0012 | 0.9492 | 0.9894 |
| <i>CHIC1</i>    | 0.0012  | 0.9519 | 0.9899 |
| <i>ZNF275</i>   | -0.0011 | 0.9521 | 0.9899 |
| <i>TMEM47</i>   | 0.0011  | 0.9536 | 0.9905 |
| <i>IGBP1</i>    | 0.0010  | 0.9595 | 0.9923 |
| <i>SMARCA1</i>  | 0.0008  | 0.9657 | 0.9930 |
| <i>TIMP1</i>    | -0.0008 | 0.9660 | 0.9931 |
| <i>RNF113A</i>  | 0.0008  | 0.9670 | 0.9932 |
| <i>MAGEC3</i>   | 0.0008  | 0.9686 | 0.9936 |
| <i>CHST7</i>    | 0.0005  | 0.9780 | 0.9956 |
| <i>NUDT10</i>   | 0.0005  | 0.9797 | 0.9960 |
| <i>GSPT2</i>    | 0.0005  | 0.9805 | 0.9960 |
| <i>FMRI</i>     | 0.0004  | 0.9834 | 0.9963 |
| <i>ODZ1</i>     | -0.0002 | 0.9908 | 0.9977 |
| <i>FTSJ1</i>    | -0.0001 | 0.9972 | 0.9995 |
| <i>HUWE1</i>    | -0.0001 | 0.9976 | 0.9995 |

**eTable 6. Association of X chromosome gene expression with neurofibrillary tangles in men, adjusted by age and education. FDR-adjusted p-values for genome-wide correction shown.**

| <b>Gene</b>    | <b>Beta</b> | <b>Pvalue unadjusted</b> | <b>Pvalue adjusted</b> |
|----------------|-------------|--------------------------|------------------------|
| <i>EMD</i>     | -0.0982     | 0.0000                   | <b>0.0266</b>          |
| <i>UBL4A</i>   | 0.0975      | 0.0000                   | <b>0.0317</b>          |
| <i>PHF16</i>   | 0.0901      | 0.0000                   | <b>0.0320</b>          |
| <i>PNMA5</i>   | -0.0841     | 0.0003                   | 0.0636                 |
| <i>SSR4</i>    | -0.0732     | 0.0006                   | 0.0821                 |
| <i>SMC1A</i>   | 0.0879      | 0.0006                   | 0.0857                 |
| <i>PRAF2</i>   | -0.0772     | 0.0008                   | 0.0949                 |
| <i>LASIL</i>   | -0.0761     | 0.0008                   | 0.0975                 |
| <i>TCEAL5</i>  | -0.0803     | 0.0008                   | 0.0981                 |
| <i>ZBED1</i>   | 0.0772      | 0.0009                   | 0.1022                 |
| <i>FOXO4</i>   | 0.0730      | 0.0012                   | 0.1119                 |
| <i>RPL10</i>   | -0.0749     | 0.0013                   | 0.1156                 |
| <i>FAM156B</i> | -0.0736     | 0.0015                   | 0.1247                 |
| <i>ARMCX4</i>  | -0.0709     | 0.0016                   | 0.1283                 |
| <i>ZMAT1</i>   | -0.0698     | 0.0020                   | 0.1410                 |
| <i>FAM127A</i> | -0.0673     | 0.0021                   | 0.1419                 |
| <i>GYG2</i>    | 0.0732      | 0.0028                   | 0.1603                 |
| <i>POLA1</i>   | 0.0728      | 0.0031                   | 0.1671                 |
| <i>HCFC1</i>   | 0.0698      | 0.0034                   | 0.1735                 |
| <i>FAM123B</i> | 0.0670      | 0.0039                   | 0.1793                 |
| <i>GEMIN8</i>  | -0.0643     | 0.0060                   | 0.2095                 |
| <i>HUWE1</i>   | 0.0649      | 0.0060                   | 0.2099                 |
| <i>PHF6</i>    | 0.0637      | 0.0069                   | 0.2175                 |
| <i>GK</i>      | -0.0658     | 0.0071                   | 0.2206                 |
| <i>IRAK1</i>   | 0.0616      | 0.0071                   | 0.2206                 |
| <i>PDZD11</i>  | -0.0607     | 0.0072                   | 0.2215                 |
| <i>BEX4</i>    | -0.0602     | 0.0083                   | 0.2334                 |
| <i>SLC35A2</i> | -0.0590     | 0.0085                   | 0.2341                 |
| <i>HAUS7</i>   | -0.0613     | 0.0093                   | 0.2383                 |
| <i>F8A3</i>    | 0.0563      | 0.0102                   | 0.2476                 |
| <i>TSPAN7</i>  | -0.0555     | 0.0112                   | 0.2561                 |
| <i>NAA10</i>   | -0.0576     | 0.0114                   | 0.2567                 |
| <i>ARHGAP4</i> | -0.0576     | 0.0119                   | 0.2608                 |
| <i>EBP</i>     | -0.0591     | 0.0124                   | 0.2623                 |
| <i>RBMX2</i>   | -0.0581     | 0.0127                   | 0.2645                 |
| <i>MTCP1NB</i> | -0.0585     | 0.0135                   | 0.2681                 |
| <i>OFD1</i>    | -0.0554     | 0.0137                   | 0.2703                 |
| <i>CLCN4</i>   | 0.0556      | 0.0138                   | 0.2709                 |
| <i>RAB9A</i>   | 0.0563      | 0.0140                   | 0.2722                 |

|                |         |        |        |
|----------------|---------|--------|--------|
| <i>F8A2</i>    | 0.0539  | 0.0144 | 0.2743 |
| <i>SMARCA1</i> | 0.0588  | 0.0145 | 0.2746 |
| <i>TRMT2B</i>  | 0.0522  | 0.0148 | 0.2776 |
| <i>RIBC1</i>   | -0.0568 | 0.0154 | 0.2798 |
| <i>RAI2</i>    | 0.0549  | 0.0157 | 0.2818 |
| <i>BCORL1</i>  | 0.0583  | 0.0158 | 0.2821 |
| <i>FAM155B</i> | 0.0532  | 0.0164 | 0.2841 |
| <i>ZNF185</i>  | -0.0514 | 0.0169 | 0.2876 |
| <i>GPR143</i>  | -0.0547 | 0.0169 | 0.2876 |
| <i>CCDC160</i> | 0.0572  | 0.0174 | 0.2897 |
| <i>BEX2</i>    | -0.0542 | 0.0183 | 0.2915 |
| <i>APLN</i>    | 0.0580  | 0.0186 | 0.2915 |
| <i>FUNDC1</i>  | -0.0552 | 0.0188 | 0.2924 |
| <i>FAM127B</i> | -0.0513 | 0.0190 | 0.2940 |
| <i>MID1IP1</i> | 0.0519  | 0.0192 | 0.2957 |
| <i>MED14</i>   | -0.0522 | 0.0209 | 0.3055 |
| <i>GLA</i>     | -0.0524 | 0.0225 | 0.3144 |
| <i>CHIC1</i>   | 0.0510  | 0.0245 | 0.3253 |
| <i>TAF9B</i>   | -0.0525 | 0.0267 | 0.3335 |
| <i>DDX26B</i>  | -0.0508 | 0.0277 | 0.3384 |
| <i>TCEAL2</i>  | -0.0501 | 0.0292 | 0.3445 |
| <i>FRMPD3</i>  | 0.0485  | 0.0308 | 0.3505 |
| <i>STAG2</i>   | 0.0471  | 0.0309 | 0.3511 |
| <i>CFP</i>     | -0.0477 | 0.0320 | 0.3542 |
| <i>NKAP</i>    | -0.0534 | 0.0348 | 0.3636 |
| <i>KLHL13</i>  | 0.0492  | 0.0363 | 0.3693 |
| <i>PGRMC1</i>  | -0.0453 | 0.0391 | 0.3762 |
| <i>MSL3</i>    | 0.0470  | 0.0392 | 0.3765 |
| <i>F8A1</i>    | -0.0427 | 0.0402 | 0.3785 |
| <i>CSTF2</i>   | -0.0461 | 0.0418 | 0.3827 |
| <i>TIMM17B</i> | -0.0511 | 0.0417 | 0.3827 |
| <i>PDZD4</i>   | 0.0458  | 0.0423 | 0.3844 |
| <i>TCEAL4</i>  | -0.0453 | 0.0444 | 0.3915 |
| <i>YIPF6</i>   | 0.0471  | 0.0450 | 0.3928 |
| <i>BHLHB9</i>  | 0.0457  | 0.0451 | 0.3930 |
| <i>ARSD</i>    | -0.0461 | 0.0453 | 0.3939 |
| <i>WAS</i>     | -0.0457 | 0.0458 | 0.3950 |
| <i>PNMA3</i>   | -0.0460 | 0.0487 | 0.4023 |
| <i>MECP2</i>   | 0.0436  | 0.0501 | 0.4066 |
| <i>CCDC120</i> | 0.0472  | 0.0508 | 0.4088 |
| <i>G6PD</i>    | -0.0439 | 0.0549 | 0.4205 |
| <i>ASMTL</i>   | -0.0439 | 0.0572 | 0.4210 |

|                 |         |        |        |
|-----------------|---------|--------|--------|
| <i>FAM120C</i>  | 0.0473  | 0.0587 | 0.4238 |
| <i>TSC22D3</i>  | 0.0437  | 0.0598 | 0.4276 |
| <i>ZBTB33</i>   | 0.0439  | 0.0598 | 0.4278 |
| <i>NDUFA1</i>   | -0.0427 | 0.0600 | 0.4281 |
| <i>RPL36A</i>   | -0.0423 | 0.0641 | 0.4390 |
| <i>RRAGB</i>    | -0.0428 | 0.0646 | 0.4402 |
| <i>CETN2</i>    | -0.0425 | 0.0651 | 0.4413 |
| <i>KLHL4</i>    | 0.0418  | 0.0657 | 0.4422 |
| <i>TFE3</i>     | 0.0448  | 0.0658 | 0.4426 |
| <i>PTCHD1</i>   | 0.0417  | 0.0660 | 0.4432 |
| <i>WWC3</i>     | 0.0391  | 0.0664 | 0.4437 |
| <i>PHKA2</i>    | -0.0405 | 0.0666 | 0.4440 |
| <i>MCF2</i>     | 0.0416  | 0.0727 | 0.4551 |
| <i>ZNF673</i>   | -0.0398 | 0.0734 | 0.4568 |
| <i>USP11</i>    | -0.0414 | 0.0752 | 0.4605 |
| <i>RPS6KA3</i>  | 0.0400  | 0.0753 | 0.4608 |
| <i>DMRTC1</i>   | -0.0383 | 0.0762 | 0.4625 |
| <i>TMEM185A</i> | 0.0394  | 0.0762 | 0.4625 |
| <i>ELK1</i>     | 0.0411  | 0.0774 | 0.4644 |
| <i>RHOXF1</i>   | -0.0356 | 0.0775 | 0.4644 |
| <i>PIN4</i>     | -0.0394 | 0.0775 | 0.4644 |
| <i>IKBKG</i>    | -0.0402 | 0.0804 | 0.4713 |
| <i>BCOR</i>     | 0.0412  | 0.0835 | 0.4782 |
| <i>RPGR</i>     | -0.0396 | 0.0847 | 0.4799 |
| <i>ZCCHC12</i>  | -0.0392 | 0.0868 | 0.4848 |
| <i>HPRT1</i>    | -0.0402 | 0.0892 | 0.4902 |
| <i>TXLNG</i>    | -0.0367 | 0.0888 | 0.4902 |
| <i>SLC25A53</i> | 0.0382  | 0.0897 | 0.4910 |
| <i>PIR</i>      | -0.0359 | 0.0897 | 0.4910 |
| <i>TCEAL7</i>   | -0.0379 | 0.0902 | 0.4924 |
| <i>NHS</i>      | 0.0392  | 0.0915 | 0.4950 |
| <i>MOSPD1</i>   | 0.0403  | 0.0921 | 0.4952 |
| <i>ZNF674</i>   | 0.0388  | 0.0952 | 0.5017 |
| <i>HMGB3</i>    | -0.0381 | 0.0956 | 0.5028 |
| <i>SPIN2B</i>   | -0.0402 | 0.0960 | 0.5036 |
| <i>LDOC1</i>    | -0.0361 | 0.0960 | 0.5036 |
| <i>PPP1R3F</i>  | 0.0398  | 0.0961 | 0.5037 |
| <i>BEX1</i>     | -0.0385 | 0.0985 | 0.5074 |
| <i>CA5B</i>     | -0.0367 | 0.1005 | 0.5101 |
| <i>ACSL4</i>    | -0.0365 | 0.1050 | 0.5179 |
| <i>LONRF3</i>   | 0.0371  | 0.1059 | 0.5185 |
| <i>DDX3X</i>    | 0.0418  | 0.1064 | 0.5189 |

|                  |         |        |        |
|------------------|---------|--------|--------|
| <i>TCEANC</i>    | 0.0348  | 0.1074 | 0.5191 |
| <i>TMLHE</i>     | -0.0379 | 0.1075 | 0.5192 |
| <i>CIGALTIC1</i> | 0.0386  | 0.1169 | 0.5335 |
| <i>AIFM1</i>     | -0.0358 | 0.1178 | 0.5353 |
| <i>PNCK</i>      | -0.0358 | 0.1219 | 0.5404 |
| <i>FLNA</i>      | -0.0340 | 0.1239 | 0.5428 |
| <i>ZNF630</i>    | 0.0346  | 0.1265 | 0.5476 |
| <i>ARMCX5</i>    | -0.0347 | 0.1276 | 0.5495 |
| <i>ARAF</i>      | -0.0356 | 0.1288 | 0.5512 |
| <i>CXorf23</i>   | -0.0356 | 0.1299 | 0.5536 |
| <i>IDH3G</i>     | -0.0351 | 0.1328 | 0.5582 |
| <i>NLGN4X</i>    | 0.0341  | 0.1347 | 0.5605 |
| <i>CXorf56</i>   | -0.0336 | 0.1393 | 0.5656 |
| <i>HTATSF1</i>   | 0.0339  | 0.1404 | 0.5665 |
| <i>PHF8</i>      | 0.0343  | 0.1428 | 0.5696 |
| <i>TBC1D25</i>   | 0.0323  | 0.1437 | 0.5712 |
| <i>APOO</i>      | -0.0352 | 0.1442 | 0.5720 |
| <i>ZFX</i>       | 0.0340  | 0.1443 | 0.5721 |
| <i>HDHD1</i>     | 0.0313  | 0.1498 | 0.5781 |
| <i>UXT</i>       | 0.0323  | 0.1531 | 0.5822 |
| <i>TAF1</i>      | -0.0356 | 0.1543 | 0.5824 |
| <i>TSPYL2</i>    | -0.0314 | 0.1616 | 0.5911 |
| <i>BEX5</i>      | -0.0340 | 0.1621 | 0.5918 |
| <i>RBM10</i>     | -0.0311 | 0.1624 | 0.5923 |
| <i>ATRX</i>      | 0.0342  | 0.1672 | 0.5980 |
| <i>DNASE1L1</i>  | -0.0291 | 0.1731 | 0.6037 |
| <i>GPKOW</i>     | -0.0349 | 0.1732 | 0.6037 |
| <i>TCEAL6</i>    | -0.0311 | 0.1736 | 0.6045 |
| <i>ARMCX6</i>    | -0.0317 | 0.1745 | 0.6060 |
| <i>REPS2</i>     | 0.0311  | 0.1746 | 0.6061 |
| <i>KDM5C</i>     | 0.0328  | 0.1780 | 0.6105 |
| <i>PDHA1</i>     | -0.0289 | 0.1801 | 0.6132 |
| <i>HCCS</i>      | 0.0309  | 0.1810 | 0.6136 |
| <i>NDUFB11</i>   | 0.0307  | 0.1820 | 0.6144 |
| <i>PORCN</i>     | -0.0297 | 0.1886 | 0.6194 |
| <i>RBMX</i>      | -0.0298 | 0.1889 | 0.6196 |
| <i>MAOA</i>      | -0.0303 | 0.1945 | 0.6257 |
| <i>ENOX2</i>     | 0.0291  | 0.1945 | 0.6257 |
| <i>ZNF275</i>    | 0.0301  | 0.1949 | 0.6258 |
| <i>FAM70A</i>    | 0.0294  | 0.1973 | 0.6282 |
| <i>COL4A5</i>    | -0.0295 | 0.2072 | 0.6376 |
| <i>ARMCX3</i>    | 0.0291  | 0.2098 | 0.6403 |

|                    |         |        |        |
|--------------------|---------|--------|--------|
| <i>FRMPD4</i>      | 0.0283  | 0.2101 | 0.6406 |
| <i>SCML1</i>       | -0.0288 | 0.2121 | 0.6433 |
| <i>APEX2</i>       | 0.0290  | 0.2171 | 0.6483 |
| <i>GPRASP1</i>     | -0.0291 | 0.2178 | 0.6487 |
| <i>CASK</i>        | 0.0282  | 0.2211 | 0.6510 |
| <i>ARHGEF6</i>     | 0.0305  | 0.2255 | 0.6552 |
| <i>NAP1L3</i>      | -0.0278 | 0.2274 | 0.6562 |
| <i>SMS</i>         | -0.0278 | 0.2293 | 0.6580 |
| <i>APOOL</i>       | 0.0281  | 0.2315 | 0.6601 |
| <i>WBP5</i>        | 0.0273  | 0.2340 | 0.6628 |
| <i>GRIA3</i>       | -0.0261 | 0.2365 | 0.6652 |
| <i>HDAC6</i>       | -0.0281 | 0.2402 | 0.6681 |
| <i>IL3RA</i>       | 0.0265  | 0.2417 | 0.6693 |
| <i>ZNF41</i>       | 0.0261  | 0.2433 | 0.6708 |
| <i>CHRDLI</i>      | -0.0277 | 0.2443 | 0.6718 |
| <i>SPIN2A</i>      | 0.0262  | 0.2463 | 0.6740 |
| <i>MAOB</i>        | -0.0296 | 0.2470 | 0.6749 |
| <i>HNRNPH2</i>     | -0.0269 | 0.2497 | 0.6776 |
| <i>GABRA3</i>      | 0.0258  | 0.2590 | 0.6849 |
| <i>WDR44</i>       | 0.0265  | 0.2597 | 0.6854 |
| <i>ARSE</i>        | 0.0265  | 0.2625 | 0.6876 |
| <i>PIM2</i>        | -0.0252 | 0.2625 | 0.6876 |
| <i>ZC4H2</i>       | -0.0247 | 0.2640 | 0.6882 |
| <i>ALG13</i>       | -0.0255 | 0.2681 | 0.6916 |
| <i>TBC1D8B</i>     | -0.0246 | 0.2685 | 0.6918 |
| <i>ATP6AP2</i>     | -0.0259 | 0.2707 | 0.6936 |
| <i>FMR1</i>        | 0.0263  | 0.2710 | 0.6938 |
| <i>GABRE</i>       | -0.0257 | 0.2723 | 0.6954 |
| <i>TMSB15B</i>     | -0.0248 | 0.2723 | 0.6954 |
| <i>CITED1</i>      | -0.0271 | 0.2742 | 0.6970 |
| <i>CD99L2</i>      | 0.0237  | 0.2812 | 0.7028 |
| <i>RBM3</i>        | -0.0250 | 0.2811 | 0.7028 |
| <i>VMA21</i>       | -0.0256 | 0.2828 | 0.7041 |
| <i>IL13RA1</i>     | -0.0253 | 0.2834 | 0.7046 |
| <i>DMD</i>         | -0.0242 | 0.2836 | 0.7046 |
| <i>TSR2</i>        | -0.0249 | 0.2841 | 0.7050 |
| <i>THOC2</i>       | -0.0258 | 0.2860 | 0.7060 |
| <i>RP1-177G6.2</i> | -0.0256 | 0.2868 | 0.7066 |
| <i>NGFRAP1</i>     | -0.0248 | 0.2905 | 0.7094 |
| <i>ZNF711</i>      | 0.0242  | 0.2922 | 0.7108 |
| <i>DHR SX</i>      | -0.0247 | 0.2921 | 0.7108 |
| <i>BTK</i>         | -0.0252 | 0.2920 | 0.7108 |

|                 |         |        |        |
|-----------------|---------|--------|--------|
| <i>SCML2</i>    | 0.0264  | 0.2937 | 0.7116 |
| <i>MID2</i>     | 0.0261  | 0.2937 | 0.7116 |
| <i>ZMYM3</i>    | 0.0252  | 0.2952 | 0.7129 |
| <i>COX7B</i>    | -0.0229 | 0.2986 | 0.7164 |
| <i>SHROOM2</i>  | 0.0228  | 0.2989 | 0.7167 |
| <i>RNF128</i>   | -0.0246 | 0.3001 | 0.7172 |
| <i>FAM58A</i>   | 0.0250  | 0.3007 | 0.7172 |
| <i>ACRC</i>     | 0.0251  | 0.3059 | 0.7211 |
| <i>MORF4L2</i>  | -0.0235 | 0.3065 | 0.7214 |
| <i>MBTPS2</i>   | -0.0234 | 0.3073 | 0.7220 |
| <i>FAM104B</i>  | -0.0238 | 0.3078 | 0.7221 |
| <i>TIMP1</i>    | -0.0242 | 0.3083 | 0.7224 |
| <i>FUNDC2</i>   | 0.0238  | 0.3090 | 0.7227 |
| <i>KIAA2022</i> | 0.0235  | 0.3098 | 0.7231 |
| <i>ERAS</i>     | 0.0235  | 0.3097 | 0.7231 |
| <i>FAM122B</i>  | 0.0230  | 0.3171 | 0.7291 |
| <i>MAGT1</i>    | -0.0225 | 0.3195 | 0.7313 |
| <i>F8</i>       | -0.0219 | 0.3206 | 0.7313 |
| <i>CXorf1</i>   | 0.0223  | 0.3224 | 0.7328 |
| <i>PLCXD1</i>   | 0.0246  | 0.3256 | 0.7348 |
| <i>TMEM187</i>  | 0.0230  | 0.3284 | 0.7359 |
| <i>AP1S2</i>    | 0.0230  | 0.3294 | 0.7366 |
| <i>PSMD10</i>   | -0.0238 | 0.3345 | 0.7401 |
| <i>PRRG3</i>    | -0.0207 | 0.3397 | 0.7435 |
| <i>KCND1</i>    | 0.0205  | 0.3407 | 0.7445 |
| <i>IQSEC2</i>   | 0.0222  | 0.3412 | 0.7449 |
| <i>LAMP2</i>    | 0.0219  | 0.3454 | 0.7477 |
| <i>LRCH2</i>    | 0.0208  | 0.3467 | 0.7486 |
| <i>SNX12</i>    | 0.0209  | 0.3557 | 0.7548 |
| <i>MSN</i>      | -0.0231 | 0.3573 | 0.7555 |
| <i>CSAG1</i>    | 0.0204  | 0.3599 | 0.7576 |
| <i>BCAP31</i>   | 0.0210  | 0.3606 | 0.7577 |
| <i>VAMP7</i>    | 0.0221  | 0.3627 | 0.7593 |
| <i>WASH6P</i>   | 0.0210  | 0.3640 | 0.7602 |
| <i>RNF113A</i>  | 0.0198  | 0.3651 | 0.7608 |
| <i>PDK3</i>     | -0.0206 | 0.3668 | 0.7610 |
| <i>CXorf57</i>  | -0.0211 | 0.3720 | 0.7641 |
| <i>MAGED4B</i>  | 0.0212  | 0.3730 | 0.7647 |
| <i>TMSB4X</i>   | -0.0223 | 0.3743 | 0.7650 |
| <i>DACH2</i>    | -0.0209 | 0.3782 | 0.7680 |
| <i>KAL1</i>     | -0.0205 | 0.3821 | 0.7703 |
| <i>RPL39</i>    | -0.0207 | 0.3822 | 0.7704 |

|                   |         |        |        |
|-------------------|---------|--------|--------|
| <i>HMG5</i>       | 0.0205  | 0.3839 | 0.7717 |
| <i>UPRT</i>       | 0.0197  | 0.3896 | 0.7757 |
| <i>HSFX1</i>      | -0.0205 | 0.3912 | 0.7769 |
| <i>ATP11C</i>     | 0.0208  | 0.3966 | 0.7805 |
| <i>RGN</i>        | -0.0192 | 0.4008 | 0.7825 |
| <i>DKC1</i>       | 0.0189  | 0.4018 | 0.7832 |
| <i>DMRTC1B</i>    | -0.0197 | 0.4026 | 0.7836 |
| <i>UTP14A</i>     | -0.0181 | 0.4031 | 0.7838 |
| <i>FAM127C</i>    | -0.0174 | 0.4181 | 0.7927 |
| <i>SYN1</i>       | -0.0179 | 0.4200 | 0.7932 |
| <i>PNPLA4</i>     | -0.0192 | 0.4214 | 0.7940 |
| <i>SLC25A14</i>   | -0.0185 | 0.4254 | 0.7959 |
| <i>MORC4</i>      | 0.0183  | 0.4266 | 0.7970 |
| <i>TAB3</i>       | 0.0176  | 0.4320 | 0.8000 |
| <i>TRAPPC2</i>    | 0.0184  | 0.4340 | 0.8011 |
| <i>ZDHHC9</i>     | -0.0189 | 0.4383 | 0.8038 |
| <i>GDI1</i>       | -0.0189 | 0.4425 | 0.8069 |
| <i>PIGA</i>       | -0.0184 | 0.4426 | 0.8070 |
| <i>WDR45</i>      | 0.0182  | 0.4499 | 0.8111 |
| <i>DLG3</i>       | 0.0171  | 0.4551 | 0.8130 |
| <i>RBM41</i>      | 0.0171  | 0.4573 | 0.8138 |
| <i>OCRL</i>       | 0.0164  | 0.4599 | 0.8147 |
| <i>RAB33A</i>     | 0.0162  | 0.4605 | 0.8150 |
| <i>DIAPH2</i>     | -0.0159 | 0.4620 | 0.8165 |
| <i>GPR173</i>     | 0.0174  | 0.4634 | 0.8174 |
| <i>TSPAN6</i>     | -0.0167 | 0.4639 | 0.8176 |
| <i>PLS3</i>       | -0.0173 | 0.4646 | 0.8179 |
| <i>CHM</i>        | 0.0163  | 0.4680 | 0.8200 |
| <i>FAM133A</i>    | -0.0183 | 0.4722 | 0.8225 |
| <i>DYNLT3</i>     | -0.0173 | 0.4728 | 0.8227 |
| <i>PRRG1</i>      | 0.0161  | 0.4826 | 0.8291 |
| <i>HDAC8</i>      | -0.0156 | 0.4844 | 0.8304 |
| <i>SLITRK4</i>    | 0.0155  | 0.4857 | 0.8314 |
| <i>IL1RAPL1</i>   | -0.0175 | 0.4875 | 0.8323 |
| <i>ZNF75D</i>     | -0.0155 | 0.4870 | 0.8323 |
| <i>AL158821.1</i> | -0.0155 | 0.4901 | 0.8326 |
| <i>CUL4B</i>      | 0.0165  | 0.4911 | 0.8330 |
| <i>DRP2</i>       | -0.0158 | 0.4944 | 0.8343 |
| <i>GNL3L</i>      | 0.0157  | 0.4950 | 0.8344 |
| <i>MAGEH1</i>     | -0.0155 | 0.4969 | 0.8357 |
| <i>SASH3</i>      | -0.0169 | 0.5000 | 0.8380 |
| <i>INE1</i>       | -0.0160 | 0.5069 | 0.8405 |

|                  |         |        |        |
|------------------|---------|--------|--------|
| <i>CYBB</i>      | -0.0167 | 0.5080 | 0.8413 |
| <i>PPEF1</i>     | -0.0158 | 0.5092 | 0.8415 |
| <i>MCTS1</i>     | -0.0157 | 0.5110 | 0.8428 |
| <i>RPS4X</i>     | -0.0154 | 0.5137 | 0.8438 |
| <i>SUV39H1</i>   | 0.0149  | 0.5151 | 0.8440 |
| <i>NUDT10</i>    | 0.0150  | 0.5163 | 0.8446 |
| <i>AFF2</i>      | 0.0142  | 0.5177 | 0.8446 |
| <i>VBPI</i>      | -0.0141 | 0.5181 | 0.8447 |
| <i>ARX</i>       | 0.0146  | 0.5183 | 0.8447 |
| <i>SLC25A43</i>  | -0.0139 | 0.5205 | 0.8453 |
| <i>SLC38A5</i>   | -0.0157 | 0.5202 | 0.8453 |
| <i>RGAG4</i>     | 0.0146  | 0.5219 | 0.8462 |
| <i>PABPC1L2A</i> | 0.0142  | 0.5269 | 0.8486 |
| <i>PLP2</i>      | -0.0146 | 0.5296 | 0.8501 |
| <i>MAP7D3</i>    | 0.0145  | 0.5318 | 0.8510 |
| <i>MUM1L1</i>    | 0.0140  | 0.5336 | 0.8514 |
| <i>IGSF1</i>     | -0.0140 | 0.5345 | 0.8518 |
| <i>CLIC2</i>     | 0.0144  | 0.5447 | 0.8578 |
| <i>NDP</i>       | 0.0144  | 0.5462 | 0.8585 |
| <i>ABCD1</i>     | 0.0131  | 0.5493 | 0.8604 |
| <i>NSDHL</i>     | -0.0137 | 0.5515 | 0.8611 |
| <i>MAGEC3</i>    | -0.0122 | 0.5548 | 0.8619 |
| <i>CXorf38</i>   | -0.0149 | 0.5559 | 0.8624 |
| <i>FAM122C</i>   | -0.0147 | 0.5583 | 0.8639 |
| <i>PRPS2</i>     | -0.0132 | 0.5597 | 0.8645 |
| <i>FGD1</i>      | 0.0132  | 0.5619 | 0.8654 |
| <i>SLC9A7</i>    | 0.0127  | 0.5622 | 0.8656 |
| <i>MAGIX</i>     | -0.0137 | 0.5676 | 0.8678 |
| <i>STARD8</i>    | 0.0135  | 0.5700 | 0.8689 |
| <i>USP9X</i>     | 0.0144  | 0.5729 | 0.8701 |
| <i>TCEAL3</i>    | -0.0128 | 0.5763 | 0.8715 |
| <i>IDS</i>       | 0.0128  | 0.5763 | 0.8715 |
| <i>ZC3H12B</i>   | 0.0127  | 0.5842 | 0.8756 |
| <i>NONO</i>      | 0.0138  | 0.5868 | 0.8768 |
| <i>CSF2RA</i>    | -0.0119 | 0.5880 | 0.8774 |
| <i>LICAM</i>     | 0.0127  | 0.5899 | 0.8782 |
| <i>ATG4A</i>     | 0.0123  | 0.5936 | 0.8795 |
| <i>ZNF449</i>    | -0.0123 | 0.5955 | 0.8803 |
| <i>NXT2</i>      | 0.0122  | 0.5975 | 0.8812 |
| <i>UPF3B</i>     | -0.0134 | 0.5975 | 0.8812 |
| <i>SRPX</i>      | -0.0119 | 0.5990 | 0.8812 |
| <i>CNKSR2</i>    | 0.0119  | 0.5996 | 0.8815 |

|                      |         |        |        |
|----------------------|---------|--------|--------|
| <i>MIDI</i>          | -0.0126 | 0.6044 | 0.8829 |
| <i>PLXNA3</i>        | -0.0113 | 0.6094 | 0.8857 |
| <i>SH3KBP1</i>       | 0.0108  | 0.6111 | 0.8866 |
| <i>PCSK1N</i>        | -0.0124 | 0.6126 | 0.8873 |
| <i>CDK16</i>         | 0.0118  | 0.6125 | 0.8873 |
| <i>ITM2A</i>         | -0.0118 | 0.6126 | 0.8873 |
| <i>PNMA6C</i>        | 0.0103  | 0.6150 | 0.8882 |
| <i>KCNE1L</i>        | 0.0103  | 0.6164 | 0.8890 |
| <i>SAT1</i>          | -0.0114 | 0.6197 | 0.8898 |
| <i>RP11-706O15.1</i> | 0.0125  | 0.6227 | 0.8906 |
| <i>TBLIX</i>         | 0.0119  | 0.6230 | 0.8908 |
| <i>XIAP</i>          | 0.0113  | 0.6340 | 0.8952 |
| <i>AKAP17A</i>       | -0.0107 | 0.6355 | 0.8962 |
| <i>XK</i>            | -0.0108 | 0.6361 | 0.8964 |
| <i>PLXNB3</i>        | -0.0107 | 0.6435 | 0.8995 |
| <i>HS6ST2</i>        | 0.0104  | 0.6439 | 0.8998 |
| <i>GPC4</i>          | 0.0116  | 0.6456 | 0.9002 |
| <i>EIF2S3</i>        | -0.0104 | 0.6468 | 0.9006 |
| <i>SH3BGRL</i>       | 0.0115  | 0.6480 | 0.9009 |
| <i>MAMLD1</i>        | -0.0105 | 0.6493 | 0.9016 |
| <i>ARMCX1</i>        | -0.0107 | 0.6499 | 0.9019 |
| <i>AMOT</i>          | 0.0106  | 0.6547 | 0.9038 |
| <i>GPRASP2</i>       | -0.0100 | 0.6549 | 0.9039 |
| <i>CD99</i>          | -0.0105 | 0.6550 | 0.9040 |
| <i>RAB39B</i>        | 0.0102  | 0.6559 | 0.9044 |
| <i>SYTL4</i>         | 0.0106  | 0.6582 | 0.9050 |
| <i>GDPD2</i>         | -0.0105 | 0.6613 | 0.9066 |
| <i>MOSPD2</i>        | 0.0098  | 0.6625 | 0.9073 |
| <i>SMPX</i>          | -0.0101 | 0.6640 | 0.9077 |
| <i>SRPK3</i>         | 0.0100  | 0.6664 | 0.9085 |
| <i>BRWD3</i>         | 0.0099  | 0.6666 | 0.9086 |
| <i>IL2RG</i>         | 0.0111  | 0.6687 | 0.9094 |
| <i>DCX</i>           | 0.0103  | 0.6727 | 0.9111 |
| <i>IGBP1</i>         | 0.0092  | 0.6763 | 0.9127 |
| <i>PLP1</i>          | -0.0098 | 0.6761 | 0.9127 |
| <i>EIF1AX</i>        | 0.0098  | 0.6760 | 0.9127 |
| <i>SLC25A6</i>       | 0.0094  | 0.6767 | 0.9129 |
| <i>EFNB1</i>         | 0.0090  | 0.6819 | 0.9147 |
| <i>UBQLN2</i>        | -0.0085 | 0.6945 | 0.9191 |
| <i>PCYT1B</i>        | 0.0093  | 0.6948 | 0.9191 |
| <i>OPHN1</i>         | -0.0096 | 0.6939 | 0.9191 |
| <i>PJA1</i>          | -0.0092 | 0.6946 | 0.9191 |

|                 |         |        |        |
|-----------------|---------|--------|--------|
| <i>MPP1</i>     | 0.0088  | 0.6984 | 0.9198 |
| <i>CXorf40B</i> | -0.0085 | 0.7054 | 0.9217 |
| <i>SPIN3</i>    | -0.0084 | 0.7188 | 0.9264 |
| <i>TMEM35</i>   | 0.0085  | 0.7192 | 0.9265 |
| <i>PCDH11X</i>  | 0.0080  | 0.7207 | 0.9271 |
| <i>RLIM</i>     | 0.0083  | 0.7222 | 0.9278 |
| <i>ZDHHC15</i>  | 0.0077  | 0.7252 | 0.9285 |
| <i>ARHGEF9</i>  | -0.0079 | 0.7269 | 0.9292 |
| <i>CXorf69</i>  | -0.0084 | 0.7303 | 0.9299 |
| <i>ARSF</i>     | 0.0083  | 0.7313 | 0.9299 |
| <i>PGK1</i>     | 0.0084  | 0.7331 | 0.9304 |
| <i>ACOT9</i>    | -0.0074 | 0.7449 | 0.9348 |
| <i>GPR34</i>    | -0.0077 | 0.7460 | 0.9351 |
| <i>PRKX</i>     | 0.0070  | 0.7470 | 0.9353 |
| <i>OTUD5</i>    | -0.0069 | 0.7503 | 0.9353 |
| <i>TAZ</i>      | 0.0073  | 0.7487 | 0.9353 |
| <i>MAGEE1</i>   | -0.0073 | 0.7544 | 0.9354 |
| <i>ATP6AP1</i>  | -0.0068 | 0.7606 | 0.9365 |
| <i>CYSLTR1</i>  | -0.0071 | 0.7610 | 0.9365 |
| <i>FAM156A</i>  | -0.0069 | 0.7619 | 0.9369 |
| <i>BRCC3</i>    | -0.0068 | 0.7649 | 0.9383 |
| <i>KDM6A</i>    | 0.0076  | 0.7701 | 0.9390 |
| <i>ZNF182</i>   | -0.0064 | 0.7722 | 0.9390 |
| <i>NAP1L2</i>   | -0.0067 | 0.7761 | 0.9394 |
| <i>FHL1</i>     | -0.0070 | 0.7765 | 0.9394 |
| <i>CDKL5</i>    | -0.0065 | 0.7773 | 0.9398 |
| <i>SYP</i>      | -0.0066 | 0.7805 | 0.9409 |
| <i>UBA1</i>     | -0.0064 | 0.7892 | 0.9440 |
| <i>UBE2A</i>    | -0.0061 | 0.7900 | 0.9443 |
| <i>DUSP9</i>    | -0.0064 | 0.7907 | 0.9446 |
| <i>MTCP1</i>    | -0.0064 | 0.7916 | 0.9448 |
| <i>FTSJ1</i>    | -0.0062 | 0.7984 | 0.9477 |
| <i>HEPH</i>     | -0.0058 | 0.8057 | 0.9498 |
| <i>MTM1</i>     | -0.0061 | 0.8087 | 0.9509 |
| <i>ZXDB</i>     | -0.0055 | 0.8099 | 0.9510 |
| <i>PCDH19</i>   | -0.0060 | 0.8099 | 0.9510 |
| <i>PHKA1</i>    | 0.0055  | 0.8106 | 0.9510 |
| <i>MAGED4</i>   | 0.0052  | 0.8132 | 0.9515 |
| <i>MAGED2</i>   | 0.0055  | 0.8143 | 0.9520 |
| <i>SLITRK2</i>  | -0.0055 | 0.8144 | 0.9520 |
| <i>VSIG4</i>    | -0.0058 | 0.8165 | 0.9525 |
| <i>CCDC22</i>   | 0.0050  | 0.8211 | 0.9538 |

|                      |         |        |        |
|----------------------|---------|--------|--------|
| <i>CHST7</i>         | 0.0049  | 0.8229 | 0.9543 |
| <i>NLGN3</i>         | 0.0054  | 0.8229 | 0.9543 |
| <i>OGT</i>           | 0.0051  | 0.8324 | 0.9573 |
| <i>RENBP</i>         | 0.0049  | 0.8322 | 0.9573 |
| <i>SLC9A6</i>        | -0.0046 | 0.8370 | 0.9589 |
| <i>FAM199X</i>       | 0.0048  | 0.8386 | 0.9593 |
| <i>MAGEE2</i>        | -0.0045 | 0.8401 | 0.9596 |
| <i>CXorf26</i>       | -0.0045 | 0.8419 | 0.9601 |
| <i>GSPT2</i>         | 0.0043  | 0.8423 | 0.9603 |
| <i>MAP7D2</i>        | 0.0047  | 0.8444 | 0.9608 |
| <i>ARMCX2</i>        | -0.0044 | 0.8479 | 0.9618 |
| <i>KLF8</i>          | -0.0047 | 0.8482 | 0.9618 |
| <i>CXorf40A</i>      | 0.0041  | 0.8505 | 0.9618 |
| <i>PQBP1</i>         | 0.0042  | 0.8507 | 0.9619 |
| <i>ZNF81</i>         | 0.0042  | 0.8535 | 0.9626 |
| <i>SLC6A8</i>        | 0.0043  | 0.8544 | 0.9627 |
| <i>RP11-274K13.2</i> | -0.0040 | 0.8580 | 0.9641 |
| <i>NKRF</i>          | 0.0041  | 0.8592 | 0.9644 |
| <i>CXorf36</i>       | 0.0041  | 0.8608 | 0.9650 |
| <i>AMMECR1</i>       | 0.0041  | 0.8611 | 0.9651 |
| <i>FIGF</i>          | -0.0039 | 0.8627 | 0.9656 |
| <i>FAM3A</i>         | -0.0040 | 0.8664 | 0.9666 |
| <i>SYAP1</i>         | 0.0038  | 0.8670 | 0.9667 |
| <i>ODZ1</i>          | -0.0040 | 0.8698 | 0.9673 |
| <i>FGF13</i>         | -0.0037 | 0.8724 | 0.9679 |
| <i>HSD17B10</i>      | 0.0038  | 0.8734 | 0.9682 |
| <i>KLHL15</i>        | 0.0034  | 0.8822 | 0.9710 |
| <i>BGN</i>           | 0.0033  | 0.8869 | 0.9721 |
| <i>SLC16A2</i>       | 0.0034  | 0.8887 | 0.9723 |
| <i>LAGE3</i>         | -0.0032 | 0.8935 | 0.9733 |
| <i>TCEAL8</i>        | 0.0031  | 0.8943 | 0.9734 |
| <i>EFHC2</i>         | 0.0031  | 0.8951 | 0.9739 |
| <i>FATE1</i>         | -0.0028 | 0.8961 | 0.9744 |
| <i>RAB9B</i>         | -0.0028 | 0.8997 | 0.9757 |
| <i>TCEAL1</i>        | 0.0028  | 0.8993 | 0.9757 |
| <i>SEPT</i>          | -0.0028 | 0.9018 | 0.9761 |
| <i>MAGED1</i>        | -0.0029 | 0.9016 | 0.9761 |
| <i>USP51</i>         | -0.0028 | 0.9093 | 0.9782 |
| <i>GTPBP6</i>        | -0.0028 | 0.9097 | 0.9783 |
| <i>CXorf24</i>       | -0.0023 | 0.9136 | 0.9796 |
| <i>TMEM47</i>        | -0.0024 | 0.9150 | 0.9802 |
| <i>TRO</i>           | 0.0025  | 0.9182 | 0.9812 |

|                  |         |        |        |
|------------------|---------|--------|--------|
| <i>RBBP7</i>     | 0.0020  | 0.9256 | 0.9835 |
| <i>PPP2R3B</i>   | -0.0022 | 0.9258 | 0.9836 |
| <i>STS</i>       | 0.0020  | 0.9281 | 0.9839 |
| <i>MTMR1</i>     | -0.0022 | 0.9281 | 0.9839 |
| <i>PABPC1L2B</i> | 0.0019  | 0.9344 | 0.9850 |
| <i>TMEM164</i>   | 0.0017  | 0.9413 | 0.9870 |
| <i>TIMM8A</i>    | -0.0015 | 0.9445 | 0.9881 |
| <i>GPM6B</i>     | -0.0016 | 0.9442 | 0.9881 |
| <i>GRIPAP1</i>   | 0.0015  | 0.9469 | 0.9882 |
| <i>MMGT1</i>     | 0.0015  | 0.9491 | 0.9885 |
| <i>CTPS2</i>     | -0.0015 | 0.9504 | 0.9888 |
| <i>NUDT11</i>    | -0.0015 | 0.9509 | 0.9888 |
| <i>ZRSR2</i>     | -0.0013 | 0.9539 | 0.9895 |
| <i>GJB1</i>      | 0.0013  | 0.9542 | 0.9896 |
| <i>FAAH2</i>     | -0.0012 | 0.9588 | 0.9908 |
| <i>PNMA6A</i>    | 0.0009  | 0.9681 | 0.9928 |
| <i>PRDX4</i>     | 0.0010  | 0.9688 | 0.9929 |
| <i>MED12</i>     | -0.0008 | 0.9701 | 0.9930 |
| <i>ABCB7</i>     | 0.0010  | 0.9699 | 0.9930 |
| <i>ATP2B3</i>    | -0.0008 | 0.9726 | 0.9936 |
| <i>SHROOM4</i>   | 0.0008  | 0.9721 | 0.9936 |
| <i>PAK3</i>      | 0.0008  | 0.9734 | 0.9937 |
| <i>PRICKLE3</i>  | -0.0008 | 0.9738 | 0.9938 |
| <i>FAM50A</i>    | -0.0007 | 0.9765 | 0.9947 |
| <i>RAP2C</i>     | -0.0006 | 0.9776 | 0.9949 |
| <i>WDR13</i>     | -0.0005 | 0.9823 | 0.9962 |
| <i>PRPS1</i>     | -0.0004 | 0.9877 | 0.9974 |
| <i>SLC10A3</i>   | -0.0003 | 0.9893 | 0.9982 |
| <i>SLC25A5</i>   | -0.0002 | 0.9945 | 0.9990 |
